# Supplementary material
Source: PubMed Central journal article supplement (PMC3549273)
Supplement: NIHMS395902-supplement-1_si_001.pdf [file NIHMS395902-supplement-1_si_001.pdf]

# Supporting Information for: “Optimization of the additive CHARMM all-atom protein force field targeting improved sampling of the backbone $\phi$ , $\psi$ and sidechain $\chi_1$ and $\chi_2$ dihedral angles.”

*Robert B. Best<sup>1#</sup>, Xiao Zhu<sup>2#</sup>, Jihyun Shim<sup>2</sup>, Pedro Lopes<sup>2</sup>, Jeetain Mittal<sup>3</sup>, Michael Feig<sup>4</sup> and Alexander D. MacKerell Jr<sup>2\*</sup>.*

<sup>1</sup>University of Cambridge, Department of Chemistry, Lensfield Road, Cambridge CB2 1EW;

<sup>2</sup>Department of Pharmaceutical Sciences, School of Pharmacy, University of Maryland, 20 Penn Street, Baltimore, Maryland 21201; <sup>3</sup>Department of Chemical Engineering, Lehigh University, Bethlehem, Pennsylvania; <sup>4</sup>Department of Biochemistry and Molecular Biology and Department of Chemistry, Michigan State University, East Lansing, Michigan 48824.

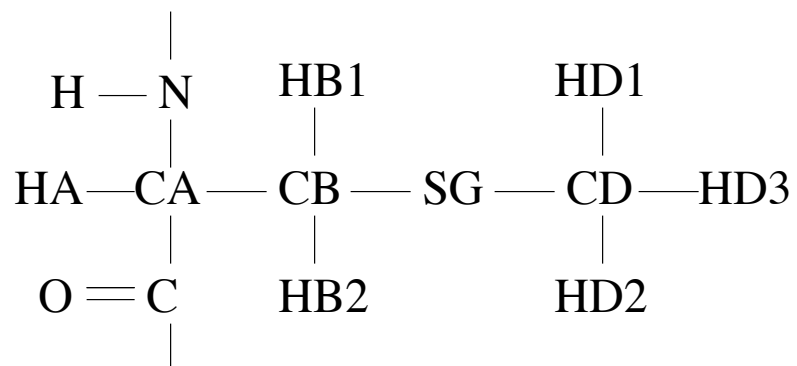

**Figure S1)** Covalent structure of the modified CME residue (see SI TableS1 for the parameters).

**Figure S2)** RMS difference of the individual helicies of the dimeric coiled-coil 1u0i as a function of simulation time. Results are for the backbone (N, Ca, C, O) atoms following least squares alignment of the backbone atoms of the individual helicies, with results presented for the helix being aligned to itself (ie. Helix A vs Helix A) or for the second helix based on alignment to the first (ie. Helix B vs Helix A). Results are presented for alignment to helix A (A) or helix B (B). The N- and C-terminal residues were excluded from the analysis.

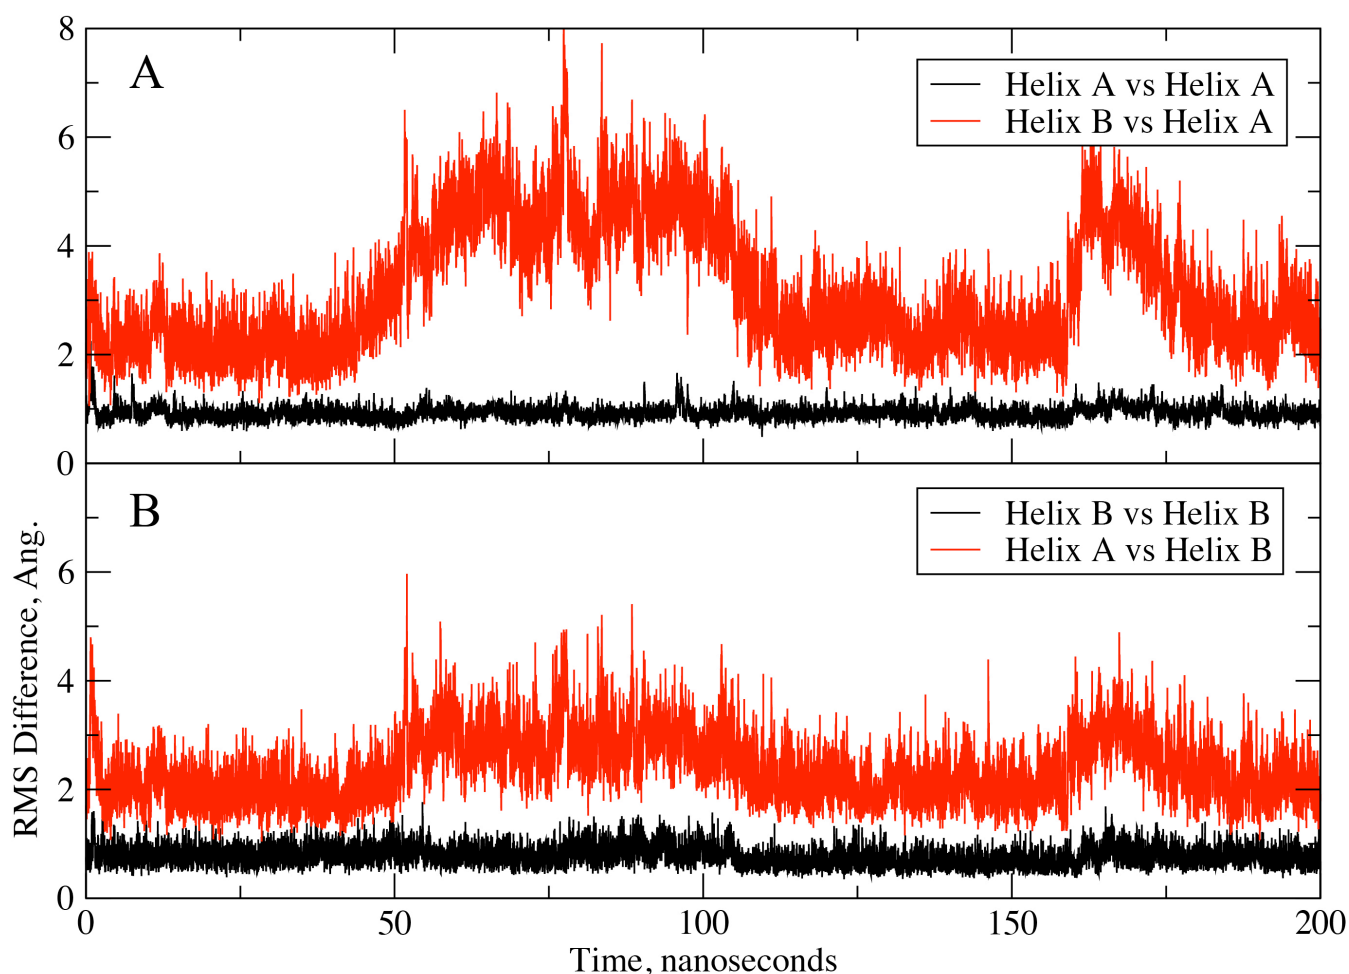

**Table S1)** Additional parameters for the S-methylated cysteine (CME) residue in HEWL19. Atom types and charges are given in upper part and torsion angle parameters are given in the lower part. The torsion potential has the form:  $V_n(\chi) = k_n(1 + \cos[n\chi - \delta_n])$  where  $k_n$  is a force constant,  $\delta_n$  is a phase shift, and  $n$  the multiplicity. All other parameter values were taken from the standard C36 force-fields. Figure S1 shows the structure of the residue.

| Atom | CHARMM Atom Type | Charge (e) |
|------|------------------|------------|
| N    | NH1              | -0.47      |
| H    | H                | 0.31       |
| CA   | CT1              | -0.07      |
| HA   | HB1              | 0.09       |
| CB   | CT2              | -0.11      |
| HB1  | HA2              | 0.09       |
| HB2  | HA2              | 0.09       |
| SG   | S                | -0.23      |
| CD   | CT3              | -0.11      |
| HD1  | HA3              | 0.09       |
| HD2  | HA3              | 0.09       |
| HD3  | HA3              | 0.09       |
| C    | C                | 0.51       |
| O    | O                | -0.51      |

| ATOM 1 | ATOM 2 | ATOM 3 | ATOM 4 | $n$ | $k_n$<br>[kcal/mol] | $\delta_n$ |
|--------|--------|--------|--------|-----|---------------------|------------|
| CT3    | S      | CT2    | CT1    | 1   | 0.24                | 180.0°     |
| CT3    | S      | CT2    | CT1    | 3   | 0.37                | 0.0°       |

**Table S2)** Distances used for water deletion, simulation temperatures, experimental protein crystal lattice distances and average percent changes for the lattice distances for the full unit-cell crystal simulations.

| PDB<br>ID | Water<br>del (Å) <sup>1</sup> | T(K) | Crystallographic |       |       | C22/CMAP |      |       | C36   |       |       |
|-----------|-------------------------------|------|------------------|-------|-------|----------|------|-------|-------|-------|-------|
|           |                               |      | A                | B     | C     | ΔA (%)   | ΔB   | ΔC    | ΔA    | ΔB    | ΔC    |
| 135L      | 2.82                          | 298  | 38.59            | 32.89 | 48.37 | 1.46     | 0.39 | 3.58  | 1.55  | 1.51  | 2.47  |
| 3EBX      | 4.00                          | 298  | 52.19            | 47.49 | 21.49 | 5.10     | 1.09 | 0.91  | 6.00  | 3.62  | -0.70 |
| 1EJG      | 3.20                          | 100  | 40.83            | 18.51 | 22.34 | -0.75    | 0.30 | 0.17  | 0.05  | -0.19 | 0.14  |
| 1I27      | 3.50                          | 282  | 29.42            | 44.34 | 49.20 | 1.72     | 3.83 | 1.70  | 2.82  | 2.13  | 1.17  |
| 5PTI      | 3.50                          | 298  | 71.88            | 25.14 | 28.89 | -2.05    | 3.94 | -0.19 | -0.43 | 3.41  | -0.79 |
| 3ICB      | 2.78                          | 298  | 53.32            | 43.94 | 29.95 | -4.15    | 0.87 | 2.60  | -1.27 | 0.80  | 0.43  |
| 1BYI      | 2.85                          | 100  | 72.53            | 47.73 | 61.58 | -0.57    | 0.34 | 2.40  | 0.00  | 0.02  | 0.77  |
| 1BZP      | 3.10                          | 298  | 36.68            | 30.60 | 68.22 | 2.54     | 0.20 | 7.63  | 4.13  | -1.74 | 10.58 |

Lattice parameters (Å) were calculated by averaging over all snapshots at 5ps intervals within the last 35ns of the 40ns crystal simulations. 1) Water O to protein non-hydrogen distance used for the deletion of water molecules during preparation of the crystal for MD simulations.

**Table S3)** Estimated uncertainty for predictions of scalar couplings from various Karplus equation parametrizations and for predictions of chemical shifts by SPARTA+. In most cases, the RMSD between experimental and predicted observables reported by the original authors was used (since the same data were often used in the parameter fitting, this value of  $\sigma$  should be considered a lower bound). Deviations reported by Hu and Bax were absolute deviations, and have therefore been increased by 30% to approximate mean-square deviations.<sup>1</sup> Deviations from the data of Ding and Gronenborn<sup>2</sup> and Hennig *et al.*<sup>3</sup> were computed directly from the experimental and predicted couplings in those papers. The value of  $\sigma$  for prediction of C' chemical shifts is one case in which the data used in the test were not included in the optimization of the method.<sup>4</sup>

| Parameter                               | $\sigma$    | Source                            |
|-----------------------------------------|-------------|-----------------------------------|
| Backbone J-Couplings                    |             |                                   |
| <sup>3</sup> J <sub>HNHA</sub>          | 0.91 Hz     | Hu and Bax <sup>1</sup>           |
| <sup>3</sup> J <sub>HNC</sub>           | 0.59 Hz     | Hu and Bax <sup>1</sup>           |
| <sup>3</sup> J <sub>HAC</sub>           | 0.38 Hz     | Hu and Bax <sup>1</sup>           |
| <sup>3</sup> J <sub>CC</sub>            | 0.22 Hz     | Hu and Bax <sup>1</sup>           |
| <sup>3</sup> J <sub>HNCB</sub>          | 0.39 Hz     | Hu and Bax <sup>1</sup>           |
| <sup>1</sup> J <sub>NCA</sub>           | 0.59 Hz     | Ding and Gronenborn <sup>2</sup>  |
| <sup>2</sup> J <sub>NCA</sub>           | 0.50 Hz     | Ding and Gronenborn <sup>2</sup>  |
| <sup>3</sup> J <sub>NCA</sub>           | 0.10 Hz     | Hennig <i>et al.</i> <sup>3</sup> |
| Side-chain J-Couplings                  |             |                                   |
| <sup>3</sup> J <sub>NCG</sub> (Thr)     | 0.21 Hz     | Chou and Bax <sup>5</sup>         |
| <sup>3</sup> J <sub>CCG</sub> (Thr)     | 0.21 Hz     | Chou and Bax <sup>5</sup>         |
| <sup>3</sup> J <sub>NCG</sub> (Ile,Val) | 0.25 Hz     | Chou and Bax <sup>5</sup>         |
| <sup>3</sup> J <sub>CCG</sub> (Ile,Val) | 0.25 Hz     | Chou and Bax <sup>5</sup>         |
| <sup>3</sup> J <sub>HAHB</sub>          | 0.31 Hz     | Perez <i>et al.</i> <sup>6</sup>  |
| <sup>3</sup> J <sub>NHB</sub>           | 0.41 Hz     | Perez <i>et al.</i> <sup>6</sup>  |
| <sup>3</sup> J <sub>CHB</sub>           | 0.47 Hz     | Perez <i>et al.</i> <sup>6</sup>  |
| <sup>3</sup> J <sub>HACG</sub>          | 0.33 Hz     | Perez <i>et al.</i> <sup>6</sup>  |
| <sup>3</sup> J <sub>NCG</sub>           | 0.18 Hz     | Perez <i>et al.</i> <sup>6</sup>  |
| <sup>3</sup> J <sub>CCG</sub>           | 0.36 Hz     | Perez <i>et al.</i> <sup>6</sup>  |
| Chemical Shifts                         |             |                                   |
| C' Shifts                               | 1.09 p.p.m. | Shen and Bax <sup>4</sup>         |

**Table S4)** Sidechain dihedral parameter definitions.

| Residue | $\chi^1$            | $\chi^{1'}$       | $\chi^2$           | $\chi^{2'}$      |
|---------|---------------------|-------------------|--------------------|------------------|
| Ile     | NH1/C CT1 CT1 CT2   | NH1/C CT1 CT1 CT3 | CT1 CT1 CT2 CT3    |                  |
| Val     | NH1/C CT1 CT1 CT3   |                   |                    |                  |
| Thr     | NH1/C CT1 CT1 OH1   | NH1/C CT1 CT1 CT3 | CT1 CT1 OH1 H      |                  |
| Leu     | NH1/C CT1 CT2 CT1   |                   | CT1 CT2 CT1 CT3    |                  |
| Lys     | NH1/C CT1 CT2 CT2   |                   | CT1 CT2 CT2 CT2    |                  |
| Arg     | NH1/C CT1 CT2 CT2   |                   | CT1 CT2 CT2 CT2    |                  |
| Gln     | NH1/C CT1 CT2 CT2   |                   | CT1 CT2 CT2 CC     |                  |
| Met     | NH1/C CT1 CT2 CT2   |                   | CT1 CT2 CT2 S      |                  |
| Phe     | NH1/C CT1 CT2 CA    |                   | CT1 CT2 CA CA      |                  |
| Tyr     | NH1/C CT1 CT2 CA    |                   | CT1 CT2 CA CA      |                  |
| Asn     | NH1/C CT1 CT2 CC    |                   | CT1 CT2 CC NH2     | CT1 CT2 CC O     |
| Asp     | NH1/C CT1 CT2A CC   |                   | CT1 CT2A CC OC     |                  |
| Trp     | NH1/C CT1 CT2 CY    |                   | CT1 CT2 CY CA      | CT1 CT2 CY CP1   |
| Hsd/Hse | NH1/C CT1 CT2 CPH1  |                   | CT1 CT2 CPH1 CPH1  | CT1 CT2 CPH1 NR  |
| Hsp     | NH1/C CT1 CT2A CPH1 |                   | CT1 CT2A CPH1 CPH1 | CT1 CT2A CPH1 NR |
| Ser     | NH1/C CT1 CT2 OH1   |                   | CT1 CT2 OH1 H      |                  |
| Glu     | NH1/C CT1 CT2A CT2  |                   | CT1 CT2A CT2 CC    |                  |
| Cys     | NH1/C CT1 CT2 S     |                   | CT1 CT2 S HS       |                  |
| Ala/Gly | - - - -             |                   |                    |                  |
| Pro     | - - - -             |                   |                    |                  |

\*Boxed parameters are shared by two or more residues; NR1 (HSD), NR2 (HSE)  
 Atom type CT2A created for Cb atom of Glu and Hsp to differentiate those parameters from Lys/Arg/Gln/Met and Hsd/Hse sets, respectively

**Table S5)** Differences in relative energy of local minima between C22/CMAP and QM calculations.

| Residue \ Rotamer | tt    | tm    | tp    | mt    | mm    | mp    | pt    | pm    | pp    | RMSD |
|-------------------|-------|-------|-------|-------|-------|-------|-------|-------|-------|------|
| Alpha             |       |       |       |       |       |       |       |       |       |      |
| Arg               | 2.94  | 5.12  | 1.65  | 2.77  | 1.54  | 6.40  | 5.57  | 10.70 | 7.74  | 5.72 |
| Asn               | 3.68  | 1.75  | -0.03 | 2.29  | -2.07 | 1.64  | -0.93 | 3.01  | -0.53 | 2.08 |
| Asp               | 2.29  | 2.58  | 0.84  | 2.07  | -2.66 | 0.42  | 0.40  | -1.12 | -3.40 | 2.03 |
| Cys               | 1.23  | 1.15  | 0.53  | -0.16 | 0.97  | 0.19  | -2.23 | -0.53 | 0.43  | 1.03 |
| Gln               | 1.70  | 4.27  | 0.86  | -0.04 | 0.40  | 2.12  | -0.24 | 4.20  | 0.92  | 2.24 |
| Glu               | -1.42 | 12.93 | 7.33  | -2.04 | 4.51  | 2.03  | -3.11 | -1.31 | 4.51  | 5.61 |
| Hsd               | 2.93  | 2.00  | 3.26  | 0.15  | 1.72  | 1.87  | 1.87  | 0.18  | -0.68 | 1.93 |
| Hse               | 7.33  | 5.06  | 3.81  | 5.30  | 1.28  | 4.09  | 1.11  | 2.74  | 1.06  | 4.08 |
| Hsp               | 8.99  | 2.42  | 4.46  | 6.20  | 4.28  | 5.61  | 16.15 | 10.68 | 7.43  | 8.33 |
| Ile               | 0.80  | 2.51  | 1.32  | 0.79  | 1.13  | 1.01  | -0.53 | -0.72 | -0.87 | 1.21 |
| Leu               | 3.43  | 3.14  | 1.98  | 0.91  | 0.28  | 0.56  | 0.78  | 0.12  | 0.36  | 1.75 |
| Lys               | 3.97  | 6.00  | 1.71  | 3.54  | 1.96  | 7.35  | 6.03  | 11.95 | 9.38  | 6.60 |
| Met               | 0.88  | 4.03  | 1.52  | -0.51 | 1.60  | 1.38  | 0.24  | 1.59  | -2.68 | 1.94 |
| Phe               | 1.96  | 2.78  | 1.44  | 0.17  | 0.34  | -0.01 | -1.42 | -0.28 | 0.19  | 1.33 |
| Ser               | 1.37  | 2.16  | 1.46  | -0.33 | 0.01  | 0.56  | -2.99 | -1.45 | 1.27  | 1.55 |
| Thr               | 0.94  | 1.63  | 0.94  | 0.67  | 1.07  | 1.13  | -3.76 | -1.97 | 0.05  | 1.68 |
| Trp               | 1.11  | 0.83  | 0.63  | 1.00  | -0.55 | -1.16 | -1.60 | -1.82 | -1.79 | 1.25 |
| Tyr               | 1.73  | 3.12  | 1.80  | 0.45  | 0.95  | 0.06  | -0.79 | -0.25 | 0.67  | 1.42 |
| Val               | 0.98  |       |       |       | -0.08 |       |       |       | 1.13  | 0.86 |
| AVG               | 2.47  | 3.53  | 1.97  | 1.29  | 0.88  | 1.96  | 0.81  | 1.98  | 1.33  |      |
| RMSD              | 3.39  | 4.42  | 2.61  | 2.40  | 1.90  | 3.02  | 4.58  | 4.84  | 3.65  |      |
| AVG(Alpha)        |       |       |       |       | 1.80  |       |       |       |       |      |
| RMSD(Alpha)       |       |       |       |       | 3.55  |       |       |       |       |      |
| Beta              |       |       |       |       |       |       |       |       |       |      |
| Arg               | 0.95  | 2.36  | 1.75  | 1.15  | 1.58  | 3.08  | 1.39  | 3.71  | 2.00  | 2.17 |
| Asn               | 0.26  | -0.23 | -0.37 | -0.07 | -2.93 | -0.73 | -0.76 | 0.45  | -2.49 | 1.35 |
| Asp               | 4.78  | 4.49  | 2.55  | 4.46  | 1.08  | 2.96  | 2.86  | 4.29  | -0.98 | 3.45 |
| Cys               | -1.79 | -0.19 | 0.56  | -1.93 | -1.22 | -1.23 | -2.48 | -1.82 | -1.38 | 1.55 |
| Gln               | -1.03 | 1.95  | 0.56  | -1.08 | -0.53 | 2.32  | -1.10 | 1.62  | 0.23  | 1.33 |
| Glu               | 0.33  | 11.96 | 3.56  | -0.37 | 3.81  | 8.45  | -0.76 | 7.62  | 9.33  | 6.56 |
| Hsd               | 0.60  | -0.28 | 0.33  | 0.55  | -0.20 | 0.06  | -0.11 | 0.56  | -1.40 | 0.59 |
| Hse               | 3.21  | 2.53  | 3.54  | 4.73  | 1.85  | 2.30  | 3.92  | 3.19  | 1.26  | 3.12 |
| Hsp               | 6.42  | 1.42  | 2.33  | 5.52  | 1.22  | 1.32  | 5.55  | 3.03  | -0.45 | 3.69 |
| Ile               | -0.25 | 0.86  | -0.92 | -0.24 | 0.00  | 1.42  | -0.63 | -0.05 | 0.42  | 0.69 |
| Leu               | 1.39  | 0.56  | -0.38 | 0.22  | 0.71  | 1.10  | 0.27  | 0.53  | 0.46  | 0.72 |
| Lys               | 1.43  | 3.65  | 2.91  | 2.13  | 2.47  | 4.49  | 2.18  | 4.83  | 2.98  | 3.19 |
| Met               | -1.05 | 2.16  | -0.34 | -0.89 | 0.29  | -1.14 | -0.79 | 0.48  | -3.12 | 1.44 |
| Phe               | -0.27 | 0.94  | -0.10 | 0.16  | -1.24 | 0.09  | -1.32 | 0.11  | -0.57 | 0.72 |
| Ser               | -2.81 | -1.37 | -0.18 | -2.54 | -1.18 | -0.85 | -2.03 | 0.20  | -0.06 | 1.58 |
| Thr               | -2.40 | -1.30 | 0.05  | -2.59 | -0.94 | -1.11 | -1.82 | 0.21  | -0.17 | 1.48 |
| Trp               | -1.50 | -1.26 | -0.79 | 0.51  | -1.80 | -1.23 | -0.44 | -1.30 | -2.39 | 1.38 |
| Tyr               | -0.14 | 1.09  | -0.22 | 0.05  | -1.04 | 0.16  | -1.45 | -0.12 | -0.20 | 0.71 |
| Val               | 0.00  |       |       |       | 1.91  |       |       |       | -0.20 | 1.11 |
| AVG               | 0.43  | 1.63  | 0.82  | 0.54  | 0.20  | 1.19  | 0.14  | 1.53  | 0.17  |      |
| RMSD              | 2.31  | 3.39  | 1.69  | 2.34  | 1.65  | 2.71  | 2.14  | 2.81  | 2.61  |      |
| AVG(Beta)         |       |       |       |       | 0.74  |       |       |       |       |      |
| RMSD(Beta)        |       |       |       |       | 2.46  |       |       |       |       |      |
| AlphaL            |       |       |       |       |       |       |       |       |       |      |
| Arg               | 3.04  | 4.07  | 4.42  | 2.18  | 4.49  | 3.72  | 1.00  | 4.02  | 0.00  | 3.35 |
| Asn               | 3.77  | 1.50  | 5.01  | 0.79  | 2.50  | 0.83  | 7.06  | 1.02  | 1.06  | 3.35 |
| Asp               | 8.59  | 6.46  | 7.91  | 5.22  | 2.10  | 4.82  | 15.93 | 13.53 | 12.02 | 9.51 |



|              |       |       |      |       |      |       |       |       |       |      |
|--------------|-------|-------|------|-------|------|-------|-------|-------|-------|------|
| Cys          | 0.75  | 0.80  | 1.62 | 0.29  | 2.83 | 2.02  | 3.65  | 1.23  | 2.42  | 2.02 |
| Gln          | 2.56  | 5.68  | 4.94 | 0.67  | 3.22 | 3.13  | 3.78  | 8.31  | 3.35  | 4.45 |
| Glu          | 6.70  |       | 6.82 | 5.20  | 3.68 | 8.23  | 8.46  | 14.48 |       | 8.29 |
| Hsd          | 2.73  | 1.67  | 3.16 | 0.62  | 1.04 | 1.51  | 2.24  | 4.65  | 3.48  | 2.64 |
| Hse          | 5.46  | 4.00  | 7.68 | 4.52  | 6.24 | 4.09  | 11.58 | 6.43  | 6.14  | 6.62 |
| Hsp          | 4.71  | -1.40 | 2.20 | 3.67  | 1.41 | 1.66  | 0.68  | -4.79 | -5.02 | 3.26 |
| Ile          | 5.80  | 7.78  | 5.47 | 4.24  | 3.44 | 4.69  | 3.20  | 5.51  | 4.42  | 5.12 |
| Leu          | 5.88  | 5.32  | 3.76 | 2.56  | 2.58 | 3.28  | 7.05  | 6.78  | 5.10  | 4.97 |
| Lys          | 3.70  | 4.94  | 5.25 | 2.59  | 6.10 | 5.94  | 2.24  | 5.72  | 0.00  | 4.50 |
| Met          | 3.11  | 9.44  | 4.18 | 2.17  | 2.87 | 2.92  | 3.73  | 7.75  | 4.51  | 5.08 |
| Phe          | 3.30  | 4.76  | 3.31 | 2.02  | 1.90 | 2.61  | 5.29  | 5.19  | 5.19  | 3.96 |
| Ser          | -0.28 | 1.36  | 3.64 | -2.05 | 1.48 | -0.33 | 4.71  | 2.47  | 3.86  | 2.68 |
| Thr          | 1.44  | 2.83  | 4.81 | 0.52  | 4.21 | 1.71  | 3.45  | 1.77  | 2.54  | 2.90 |
| Trp          | 3.29  | 2.21  | 1.98 | 2.97  | 1.66 | 0.89  | 4.14  | 2.39  | 5.69  | 3.11 |
| Tyr          | 2.79  | 5.16  | 2.55 | 2.29  | 1.61 | 2.48  | 4.68  | 4.82  | 5.58  | 3.82 |
| Val          | 0.23  |       |      |       | 1.91 |       |       |       | -1.76 | 1.51 |
| AVG          | 3.56  | 3.92  | 4.37 | 2.25  | 2.91 | 3.01  | 5.16  | 5.07  | 3.25  |      |
| RMSD         | 4.18  | 4.73  | 4.72 | 2.92  | 3.25 | 3.61  | 6.34  | 6.67  | 4.82  |      |
| AVG(AlphaL)  |       |       |      |       | 3.72 |       |       |       |       |      |
| RMSD(AlphaL) |       |       |      |       | 4.73 |       |       |       |       |      |

AVG(all) 2.09

RMSD(all) 3.69

Energy differences in kcal/mol. See Methods for rotamer and secondary structure definitions.  
Some values were not successfully calculated due to structural clash.

**Table S6)** Differences in relative energy of local minima between C22/CMAP with MCSA-fitted sidechain parameters and QM calculations.

| Residue \ Rotamer | tt     | tm    | tp    | mt    | mm    | mp    | pt    | pm    | pp    | RMSD |
|-------------------|--------|-------|-------|-------|-------|-------|-------|-------|-------|------|
|                   | Alpha  |       |       |       |       |       |       |       |       |      |
| Arg               | 2.31   | 3.90  | 0.14  | 1.26  | -0.48 | 2.93  | 4.07  | 6.88  | 5.64  | 3.75 |
| Asn               | 2.56   | 4.26  | 1.44  | 2.53  | -0.64 | 3.39  | 0.23  | 4.40  | 3.06  | 2.86 |
| Asp               | -2.53  | 0.53  | -0.96 | -0.19 | -1.97 | 1.29  | -0.31 | 1.32  | -0.73 | 1.31 |
| Cys               | 1.89   | 1.24  | 0.44  | 1.75  | 2.00  | 0.99  | 0.54  | 1.00  | 2.04  | 1.45 |
| Gln               | 2.97   | 3.85  | -0.20 | 2.41  | 0.78  | 2.08  | 1.65  | 3.70  | 1.42  | 2.42 |
| Glu               | 0.67   | 8.14  | 1.41  | 1.28  | 0.76  | 0.83  | 1.25  | -1.23 | 3.62  | 3.12 |
| Hsd               | 2.30   | 0.56  | 1.15  | -0.80 | 0.72  | 0.56  | 3.61  | 0.14  | -0.64 | 1.56 |
| Hse               | 4.09   | 4.10  | 2.40  | 3.24  | -0.31 | 2.04  | 0.35  | 1.39  | 1.28  | 2.53 |
| Hsp               | 5.04   | 3.83  | 5.42  | 1.66  | 4.00  | 5.58  | 9.60  | 8.23  | 4.99  | 5.81 |
| Ile               | 1.42   | 3.18  | 1.62  | 0.97  | 1.13  | 0.86  | 0.56  | 0.22  | 0.32  | 1.42 |
| Leu               | 3.46   | 3.48  | 1.80  | 1.23  | 0.96  | 0.78  | 1.45  | 1.77  | 1.60  | 2.06 |
| Lys               | 1.92   | 3.87  | -0.47 | 0.63  | -0.93 | 2.39  | 3.09  | 6.32  | 6.00  | 3.52 |
| Met               | 1.43   | 3.99  | 1.26  | 0.84  | 1.76  | 2.21  | 0.92  | 1.56  | -2.87 | 2.10 |
| Phe               | 1.43   | 2.15  | 0.64  | 0.86  | 1.26  | 1.32  | -0.47 | 0.91  | 1.47  | 1.26 |
| Ser               | 2.20   | 1.64  | 0.65  | 1.79  | 0.45  | -0.08 | -1.04 | -1.87 | 1.58  | 1.43 |
| Thr               | 2.07   | 1.08  | 0.31  | 2.61  | 1.08  | 0.28  | -1.28 | -2.13 | 0.56  | 1.49 |
| Trp               | 2.79   | 2.72  | 1.89  | 2.27  | 1.32  | 2.34  | -0.08 | 1.95  | 1.33  | 2.02 |
| Tyr               | 1.18   | 2.32  | 0.85  | 1.02  | 1.73  | 1.42  | -0.04 | 0.93  | 1.85  | 1.41 |
| Val               | 0.92   |       |       |       | 0.28  |       |       |       | 1.18  | 0.88 |
| AVG               | 2.01   | 3.05  | 1.10  | 1.41  | 0.73  | 1.73  | 1.34  | 1.97  | 1.77  |      |
| RMSD              | 2.51   | 3.52  | 1.74  | 1.71  | 1.46  | 2.17  | 2.81  | 3.44  | 2.78  |      |
| AVG(Alpha)        |        |       |       |       | 1.68  |       |       |       |       |      |
| RMSD(Alpha)       |        |       |       |       | 2.55  |       |       |       |       |      |
|                   | Beta   |       |       |       |       |       |       |       |       |      |
| Arg               | -0.06  | 0.32  | -0.56 | 1.07  | 0.99  | 2.05  | 0.66  | 1.52  | 1.28  | 1.11 |
| Asn               | 0.21   | 0.78  | 0.33  | -0.38 | -0.64 | 0.97  | -0.20 | 2.39  | 0.83  | 0.98 |
| Asp               | 0.59   | 3.08  | 0.84  | 0.22  | 0.14  | 2.06  | -1.14 | 3.34  | -1.73 | 1.83 |
| Cys               | -0.67  | -0.15 | 0.51  | -0.25 | -0.62 | -0.62 | 0.10  | -0.53 | 0.06  | 0.45 |
| Gln               | 0.60   | 2.03  | -0.05 | 1.18  | -0.67 | 2.61  | 0.28  | 1.12  | 0.39  | 1.27 |
| Glu               | 1.26   | 7.36  | -1.46 | 0.99  | -0.91 | 5.09  | 1.45  | 4.54  | 5.77  | 3.97 |
| Hsd               | -0.80  | -2.13 | -1.66 | -0.38 | -1.49 | -1.61 | 0.02  | -0.44 | -1.10 | 1.26 |
| Hse               | 0.80   | 0.55  | 1.34  | 1.99  | 0.08  | 0.52  | 2.20  | 2.40  | 1.68  | 1.51 |
| Hsp               | 1.03   | 1.71  | 2.33  | 2.48  | 3.09  | 2.99  | -0.14 | 1.88  | -1.01 | 2.07 |
| Ile               | 0.21   | 1.37  | -0.49 | -0.22 | 0.00  | 1.44  | 0.12  | 0.56  | 1.72  | 0.92 |
| Leu               | 1.42   | 1.07  | -0.38 | 0.34  | 1.35  | 1.24  | 0.57  | 1.84  | 1.53  | 1.19 |
| Lys               | -0.64  | 0.57  | -0.67 | 0.76  | 1.00  | 2.63  | 0.24  | 1.40  | 1.65  | 1.27 |
| Met               | -0.49  | 1.87  | -0.34 | 0.23  | 0.70  | -0.66 | -0.38 | 0.10  | -3.24 | 1.31 |
| Phe               | -0.69  | 0.66  | -0.39 | 0.79  | -0.74 | 0.62  | -0.55 | 0.50  | 0.28  | 0.60 |
| Ser               | -1.21  | -1.70 | -0.67 | -0.76 | -1.29 | -0.93 | -0.63 | -0.24 | -0.35 | 0.97 |
| Thr               | -0.77  | -1.80 | -0.70 | -0.84 | -1.37 | -1.50 | -0.02 | -0.14 | -0.31 | 1.01 |
| Trp               | -0.56  | 0.25  | 0.81  | 1.52  | -0.40 | 0.89  | 0.79  | 1.51  | 0.38  | 0.90 |
| Tyr               | -0.70  | 0.75  | -0.49 | 0.64  | -0.71 | 0.62  | -0.72 | 0.25  | 0.45  | 0.61 |
| Val               | 0.00   |       |       |       | 0.47  |       |       |       | -1.44 | 0.87 |
| AVG               | -0.02  | 0.92  | -0.09 | 0.52  | -0.05 | 1.02  | 0.15  | 1.22  | 0.36  |      |
| RMSD              | 0.77   | 2.24  | 0.96  | 1.04  | 1.10  | 1.97  | 0.79  | 1.81  | 1.85  |      |
| AVG(Beta)         |        |       |       |       | 0.45  |       |       |       |       |      |
| RMSD(Beta)        |        |       |       |       | 1.49  |       |       |       |       |      |
|                   | AlphaL |       |       |       |       |       |       |       |       |      |
| Arg               | 2.63   | 3.71  | 2.45  | 1.77  | 2.14  | 1.69  | 1.21  | 4.44  | 0.00  | 2.55 |
| Asn               | 3.10   | 3.48  | 5.56  | 1.54  | 3.32  | 1.39  | 8.14  | 2.73  | 4.04  | 4.19 |

|              |      |      |      |       |       |       |       |       |       |      |
|--------------|------|------|------|-------|-------|-------|-------|-------|-------|------|
| Asp          | 1.12 | 1.54 | 2.85 | 2.53  | 2.48  | 5.20  | 14.25 | 14.23 | 11.90 | 8.15 |
| Cys          | 1.08 | 0.68 | 0.98 | 2.34  | 3.41  | 2.48  | 5.82  | 1.91  | 3.69  | 2.92 |
| Gln          | 3.49 | 5.59 | 3.26 | 3.18  | 3.27  | 3.85  | 4.35  | 7.88  | 2.97  | 4.47 |
| Glu          | 5.76 |      | 0.54 | 6.40  | 0.28  | 7.60  | 9.19  | 17.63 |       | 8.68 |
| Hsd          | 1.12 | 0.65 | 1.31 | -0.82 | -0.13 | 0.21  | 2.87  | 4.39  | 2.77  | 2.09 |
| Hse          | 2.93 | 3.86 | 5.99 | 2.96  | 3.93  | 1.88  | 10.19 | 5.44  | 6.24  | 5.37 |
| Hsp          | 1.47 | 1.01 | 4.39 | -0.56 | 2.70  | 3.03  | -2.50 | -3.23 | -3.08 | 2.70 |
| Ile          | 5.82 | 7.63 | 5.00 | 4.10  | 3.16  | 4.57  | 3.58  | 6.97  | 5.10  | 5.29 |
| Leu          | 5.28 | 5.17 | 3.13 | 2.54  | 3.33  | 3.50  | 8.43  | 8.64  | 5.43  | 5.47 |
| Lys          | 2.37 | 4.30 | 2.22 | 1.33  | 2.18  | 2.60  | 1.40  | 5.39  | 0.00  | 2.85 |
| Met          | 3.20 | 8.33 | 3.48 | 3.02  | 2.87  | 3.84  | 3.42  | 8.14  | 3.56  | 4.88 |
| Phe          | 2.07 | 4.06 | 2.00 | 2.40  | 2.55  | 3.37  | 6.58  | 6.25  | 6.41  | 4.37 |
| Ser          | 0.31 | 0.70 | 1.84 | 0.24  | 1.21  | -0.72 | 5.85  | 1.13  | 3.99  | 2.53 |
| Thr          | 2.37 | 2.29 | 3.27 | 2.59  | 3.44  | 0.94  | 5.40  | 0.74  | 3.17  | 3.00 |
| Trp          | 3.44 | 4.01 | 3.42 | 3.18  | 3.25  | 2.90  | 6.64  | 4.98  | 7.08  | 4.57 |
| Tyr          | 1.57 | 4.22 | 1.27 | 2.52  | 2.24  | 3.24  | 5.91  | 5.90  | 6.48  | 4.16 |
| Val          | 5.44 |      |      |       | 3.91  |       |       |       | 6.15  | 5.25 |
| AVG          | 2.87 | 3.60 | 2.94 | 2.29  | 2.61  | 2.87  | 5.60  | 5.75  | 4.22  |      |
| RMSD         | 3.31 | 4.24 | 3.31 | 2.80  | 2.83  | 3.41  | 6.71  | 7.40  | 5.28  |      |
| AVG(AlphaL)  |      |      |      |       | 3.64  |       |       |       |       |      |
| RMSD(AlphaL) |      |      |      |       | 4.64  |       |       |       |       |      |

AVG(all) 1.92  
RMSD(all) 3.17

Energy differences in kcal/mol. See Methods for rotamer and secondary structure definitions.  
Some values were not successfully calculated due to structural clash.

**Table S7)** Differences in relative energy of local minima between C36 and QM calculations.

| C36<br>Residue | Rotamer |       |       |       |       |       |       |       |       |       | RMSD |
|----------------|---------|-------|-------|-------|-------|-------|-------|-------|-------|-------|------|
|                |         | tt    | tm    | tp    | mt    | mm    | mp    | pt    | pm    | pp    |      |
| Alpha          |         |       |       |       |       |       |       |       |       |       |      |
| Arg            |         | 3.49  | 5.28  | 1.71  | 1.20  | -0.60 | 2.71  | 3.94  | 6.84  | 4.66  | 3.89 |
| Asn            |         | 1.36  | 1.58  | -0.53 | 2.12  | -0.81 | 1.68  | -0.42 | 3.54  | 1.05  | 1.71 |
| Asp            |         | -1.77 | 1.23  | -0.48 | 0.80  | -0.83 | 2.21  | -0.73 | 0.61  | -1.15 | 1.22 |
| Cys            |         | 1.27  | 0.74  | 0.03  | 1.25  | 1.76  | 0.60  | 0.08  | 0.79  | 2.06  | 1.16 |
| Gln            |         | 1.62  | 3.08  | -1.06 | -0.61 | -2.02 | -0.31 | -0.87 | 1.73  | -1.94 | 1.68 |
| Glu            |         | -3.85 | 8.92  | 2.91  | -5.06 | 0.38  | 0.52  | -4.63 | -1.04 | 3.13  | 4.23 |
| Hsd            |         | 1.76  | 0.40  | 1.56  | -1.23 | 0.41  | 0.89  | 1.05  | 0.45  | -0.71 | 1.05 |
| Hse            |         | 5.06  | 4.54  | 3.22  | 3.69  | 1.29  | 2.78  | 0.58  | 2.26  | 1.96  | 3.14 |
| Hsp            |         | 4.32  | 1.99  | 3.99  | 1.52  | 2.81  | 4.52  | 9.02  | 6.85  | 3.11  | 4.80 |
| Ile            |         | 1.46  | 2.72  | 1.37  | 1.31  | 0.97  | 0.84  | 0.69  | -0.01 | -0.23 | 1.30 |
| Leu            |         | 3.44  | 3.19  | 1.88  | 0.76  | 0.28  | 0.46  | 0.98  | 0.60  | 0.69  | 1.77 |
| Lys            |         | 3.34  | 5.60  | 1.36  | 0.79  | -0.84 | 2.45  | 3.18  | 6.45  | 4.95  | 3.77 |
| Met            |         | 1.57  | 3.69  | 0.80  | -0.73 | -0.36 | -0.02 | -0.29 | 0.06  | -4.55 | 2.06 |
| Phe            |         | 0.94  | 1.66  | 0.14  | 0.06  | 0.59  | 0.22  | -1.57 | -0.09 | 0.45  | 0.87 |
| Ser            |         | 1.95  | 1.13  | 0.30  | 2.09  | 0.47  | 0.29  | -1.05 | -2.14 | 1.16  | 1.37 |
| Thr            |         | 0.80  | 0.65  | -0.21 | 2.55  | 1.69  | 1.07  | -1.98 | -2.08 | 0.52  | 1.50 |
| Trp            |         | 1.40  | 1.74  | 1.33  | 2.81  | 2.50  | 3.30  | -1.20 | 1.86  | 0.88  | 2.04 |
| Tyr            |         | 0.88  | 1.96  | 0.51  | 0.37  | 1.20  | 0.42  | -1.00 | 0.10  | 0.97  | 0.98 |
| Val            |         | 0.78  |       |       |       | 4.44  |       |       |       | 1.15  | 2.68 |
| AVG            |         | 1.57  | 2.78  | 1.05  | 0.76  | 0.70  | 1.37  | 0.32  | 1.49  | 0.96  |      |
| RMSD           |         | 2.51  | 3.50  | 1.70  | 2.03  | 1.64  | 1.89  | 2.82  | 3.08  | 2.37  |      |
| AVG(Alpha)     |         |       |       |       |       | 1.22  |       |       |       |       |      |
| RMSD(Alpha)    |         |       |       |       |       | 2.46  |       |       |       |       |      |
| Beta           |         |       |       |       |       |       |       |       |       |       |      |
| Arg            |         | 1.83  | 2.19  | 1.36  | 0.96  | 0.87  | 1.94  | 1.27  | 2.13  | 1.19  | 1.60 |
| Asn            |         | -0.36 | -0.08 | -0.47 | -0.50 | -2.20 | -0.11 | -0.98 | 0.84  | -1.31 | 0.99 |
| Asp            |         | 1.37  | 3.83  | 1.56  | 1.25  | 1.02  | 2.97  | -1.53 | 2.49  | -2.44 | 2.23 |
| Cys            |         | -0.94 | -0.10 | 0.58  | -0.52 | -0.54 | -0.59 | -0.43 | -0.56 | 0.08  | 0.54 |
| Gln            |         | -0.24 | 1.35  | -0.61 | -1.58 | -3.18 | 0.02  | -1.83 | -0.85 | -2.27 | 1.64 |
| Glu            |         | -3.05 | 9.04  | 0.12  | -5.25 | -1.19 | 4.81  | -4.31 | 4.71  | 5.21  | 4.84 |
| Hsd            |         | -0.54 | -0.66 | 0.20  | -0.78 | -1.63 | -1.28 | -0.77 | -0.07 | -2.13 | 1.10 |
| Hse            |         | 2.13  | 2.22  | 2.87  | 2.74  | 0.97  | 1.40  | 2.70  | 2.67  | 1.32  | 2.22 |
| Hsp            |         | 0.86  | 0.13  | 1.19  | 3.01  | 2.24  | 2.28  | -0.24 | 0.92  | -2.59 | 1.80 |
| Ile            |         | 0.62  | 1.34  | -0.57 | 0.32  | 0.00  | 1.48  | 0.44  | 0.42  | 1.00  | 0.83 |
| Leu            |         | 1.69  | 0.99  | -0.14 | 0.00  | 0.67  | 0.95  | 0.28  | 0.91  | 0.77  | 0.86 |
| Lys            |         | 1.44  | 2.64  | 1.45  | 0.86  | 1.08  | 2.71  | 1.02  | 2.24  | 1.43  | 1.78 |
| Met            |         | 0.04  | 1.85  | -0.34 | -1.16 | -1.19 | -2.55 | -1.15 | -1.14 | -4.90 | 2.09 |
| Phe            |         | -1.02 | 0.56  | -0.58 | 0.22  | -1.10 | 0.28  | -1.69 | -0.16 | -0.55 | 0.83 |
| Ser            |         | -1.13 | -1.94 | -0.89 | -0.21 | -1.04 | -0.77 | -0.59 | -0.59 | -0.49 | 0.97 |
| Thr            |         | -1.43 | -1.81 | -0.65 | -0.63 | -0.47 | -0.63 | -0.63 | -0.09 | -0.08 | 0.89 |
| Trp            |         | -1.53 | 0.05  | 0.92  | 2.20  | 0.91  | 2.03  | -0.32 | 0.97  | -0.59 | 1.26 |
| Tyr            |         | -0.83 | 0.79  | -0.54 | 0.26  | -0.92 | 0.43  | -1.69 | -0.24 | -0.22 | 0.79 |
| Val            |         | 0.00  |       |       |       | 4.44  |       |       |       | -0.09 | 2.56 |
| AVG            |         | -0.06 | 1.24  | 0.30  | 0.07  | -0.07 | 0.85  | -0.58 | 0.81  | -0.35 |      |
| RMSD           |         | 1.34  | 2.68  | 1.06  | 1.79  | 1.69  | 1.93  | 1.57  | 1.69  | 2.09  |      |
| AVG(Beta)      |         |       |       |       |       | 0.25  |       |       |       |       |      |
| RMSD(Beta)     |         |       |       |       |       | 1.81  |       |       |       |       |      |
| AlphaL         |         |       |       |       |       |       |       |       |       |       |      |
| Arg            |         | 4.08  | 5.50  | 3.90  | 1.67  | 1.96  | 1.62  | 1.26  | 3.25  | 0.00  | 3.05 |
| Asn            |         | 2.27  | 1.21  | 3.07  | 1.19  | 2.80  | 1.17  | 6.57  | 1.38  | 2.44  | 2.94 |

|              |      |       |      |       |       |       |       |       |       |      |
|--------------|------|-------|------|-------|-------|-------|-------|-------|-------|------|
| Asp          | 1.33 | 2.01  | 2.99 | 2.89  | 2.72  | 5.65  | 11.24 | 11.28 | 10.30 | 6.85 |
| Cys          | 0.59 | 0.16  | 0.46 | 1.66  | 3.13  | 2.34  | 4.97  | 1.81  | 3.32  | 2.53 |
| Gln          | 2.24 | 4.11  | 2.15 | 0.09  | 0.43  | 0.41  | 1.58  | 3.73  | -0.63 | 2.20 |
| Glu          | 0.33 |       | 1.67 | -0.65 | -0.48 | 4.70  | 2.41  | 9.53  |       | 4.18 |
| Hsd          | 1.00 | -0.12 | 1.77 | -1.38 | 0.23  | 0.63  | 0.90  | 3.49  | 1.66  | 1.57 |
| Hse          | 4.10 | 3.46  | 5.63 | 3.12  | 4.76  | 2.80  | 9.05  | 4.96  | 5.99  | 5.20 |
| Hsp          | 1.21 | -1.21 | 2.56 | -0.34 | 2.12  | 2.03  | -3.53 | -4.34 | -5.06 | 2.89 |
| Ile          | 5.30 | 6.94  | 4.48 | 4.31  | 2.89  | 4.04  | 3.52  | 5.75  | 4.37  | 4.76 |
| Leu          | 5.37 | 4.92  | 3.11 | 1.99  | 2.21  | 2.73  | 6.72  | 6.44  | 4.55  | 4.55 |
| Lys          | 4.03 | 6.34  | 3.83 | 1.40  | 2.20  | 2.73  | 1.63  | 4.33  | 0.00  | 3.44 |
| Met          | 3.19 | 8.34  | 2.98 | 1.28  | 0.61  | 1.12  | 1.93  | 3.62  | 1.36  | 3.50 |
| Phe          | 1.53 | 2.97  | 1.42 | 1.44  | 1.82  | 2.52  | 4.25  | 4.19  | 4.41  | 2.98 |
| Ser          | 0.34 | 0.25  | 1.53 | 0.51  | 1.19  | -0.56 | 5.44  | 0.92  | 2.93  | 2.20 |
| Thr          | 0.92 | 1.42  | 2.23 | 2.40  | 3.92  | 1.66  | 4.04  | 0.83  | 2.25  | 2.44 |
| Trp          | 2.08 | 2.25  | 2.15 | 3.55  | 4.41  | 3.88  | 4.34  | 4.16  | 6.22  | 3.89 |
| Tyr          | 1.21 | 3.33  | 0.88 | 1.72  | 1.69  | 2.54  | 3.96  | 3.97  | 4.70  | 2.97 |
| Val          | 5.10 |       |      |       | 4.44  |       |       |       | 5.99  | 5.21 |
| AVG          | 2.43 | 3.05  | 2.60 | 1.49  | 2.27  | 2.33  | 3.90  | 3.85  | 3.04  |      |
| RMSD         | 2.96 | 4.02  | 2.89 | 2.07  | 2.69  | 2.78  | 5.06  | 5.07  | 4.47  |      |
| AVG(AlphaL)  |      |       |      |       | 2.77  |       |       |       |       |      |
| RMSD(AlphaL) |      |       |      |       | 3.70  |       |       |       |       |      |
| AVG(all)     |      |       |      |       |       | 1.41  |       |       |       |      |
| RMSD(all)    |      |       |      |       |       | 2.77  |       |       |       |      |

Energy differences in kcal/mol. See Methods for rotamer and secondary structure definitions. Some values were not successfully calculated due to structural clash.

Table S8) RMS Difference between the QM and MM potential energy surfaces based on regions with relative energies below 2 kcal/mol (Low) and from 2 – 12 kcal/mol (high) above the local minima on each of the three  $\chi_1/\chi_2$  surfaces for each amino acid.

| Residue | LOW (0-2 kcal/mol) |     |      | HIGH (2-12 kcal/mol) |     |      |
|---------|--------------------|-----|------|----------------------|-----|------|
|         | C22                | C36 | DIFF | C22                  | C36 | DIFF |

|                            |      |      |              |      |      |              |
|----------------------------|------|------|--------------|------|------|--------------|
| Arg                        | 1.16 | 1.06 | -0.10        | 2.50 | 2.49 | -0.02        |
| Asn                        | 1.11 | 1.27 | 0.16         | 1.99 | 1.68 | -0.31        |
| Asp                        | 1.07 | 1.10 | 0.03         | 2.71 | 1.93 | -0.78        |
| Cys                        | 0.96 | 0.63 | -0.33        | 1.70 | 1.34 | -0.37        |
| Gln                        | 1.38 | 1.49 | 0.11         | 1.84 | 1.68 | -0.16        |
| Glu                        | 1.05 | 1.37 | 0.32         | 3.16 | 2.88 | -0.28        |
| Hsd                        | 1.12 | 1.20 | 0.08         | 1.41 | 1.28 | -0.13        |
| Hse                        | 1.45 | 1.35 | -0.10        | 2.19 | 1.82 | -0.37        |
| Hsp                        | 0.72 | 0.85 | 0.13         | 3.57 | 2.39 | -1.17        |
| Ile                        | 0.72 | 0.51 | -0.21        | 1.32 | 1.12 | -0.20        |
| Leu                        | 0.61 | 0.64 | 0.03         | 1.57 | 1.46 | -0.11        |
| Lys                        | 1.20 | 1.07 | -0.12        | 2.39 | 2.23 | -0.16        |
| Met                        | 0.68 | 0.90 | 0.22         | 1.29 | 1.60 | 0.31         |
| Phe                        | 0.67 | 0.48 | -0.18        | 1.51 | 1.09 | -0.42        |
| Ser                        | 1.23 | 0.94 | -0.28        | 2.44 | 1.71 | -0.73        |
| Thr                        | 1.55 | 1.51 | -0.04        | 2.45 | 1.80 | -0.65        |
| Trp                        | 1.36 | 0.71 | -0.66        | 1.71 | 1.16 | -0.55        |
| Tyr                        | 0.71 | 1.11 | 0.40         | 1.51 | 1.26 | -0.24        |
| Val                        | 0.61 | 0.48 | -0.13        | 1.09 | 0.75 | -0.34        |
| <b>Mean signed error</b>   |      |      | <b>-0.04</b> |      |      | <b>-0.35</b> |
| <b>Mean unsigned error</b> |      |      | <b>0.19</b>  |      |      | <b>0.38</b>  |

**Table S9)** NMR J-coupling constants for Ala<sub>3</sub>, Ala<sub>5</sub>, Ala<sub>7</sub>, Val<sub>3</sub>, and Gly<sub>3</sub> peptides from experiment<sup>7</sup> and simulation with new force field. Results with flavodoxin-based<sup>8</sup> and DFT-based Karplus parameters (in parentheses)<sup>9</sup> for alanine- and valine-peptides. For Gly<sub>3</sub>, only DFT-based parameters were used<sup>10</sup>.

|                                                                                | Ala <sub>3</sub> |             | Ala <sub>5</sub> |             | Ala <sub>7</sub> |             | Val <sub>3</sub> |             | Gly <sub>3</sub> |       |
|--------------------------------------------------------------------------------|------------------|-------------|------------------|-------------|------------------|-------------|------------------|-------------|------------------|-------|
|                                                                                | Exp              | Sim         | Exp              | Sim         | Exp              | Sim         | Exp              | Sim         | Exp              | Sim   |
| <sup>2</sup> J(N,C <sub>α</sub> ) ψ <sub>1</sub>                               | 9.14             | 8.60        | 9.20             | 8.60        | 9.17             | 8.60        | 8.35             | 8.58        | 10.45            | 8.58  |
| <sup>3</sup> J(H <sub>N</sub> ,C <sub>α</sub> ) φ <sub>3</sub> ,ψ <sub>1</sub> | 0.70             | 0.56        | 0.67             | 0.57        | 0.71             | 0.57        | 0.77             | 0.62        | 0.78             | 0.61  |
| <sup>3</sup> J(H <sub>N</sub> ,H <sub>α</sub> ) φ <sub>2</sub>                 | 5.68             | 5.26 (6.19) | 5.59             | 5.40 (6.23) | 5.61             | 5.37 (6.30) | 7.94             | 5.52 (6.64) | 5.89             | 5.82  |
| <sup>3</sup> J(H <sub>N</sub> ,C') φ <sub>2</sub>                              | 1.13             | 1.61 (1.05) | 1.13             | 1.62 (1.13) | 1.15             | 1.59 (1.04) | 0.58             | 1.31 (0.66) | 1.10             | 1.10  |
| <sup>3</sup> J(H <sub>α</sub> ,C') φ <sub>2</sub>                              | 1.84             | 1.73 (1.74) | 1.85             | 1.97 (2.02) | 1.89             | 1.77 (1.78) | 2.42             | 1.80 (1.84) | 4.01             | 3.73  |
| <sup>3</sup> J(C',C') φ <sub>2</sub>                                           | -                | 0.79 (0.84) | 0.19             | 0.78 (0.83) | -                | 0.81 (0.86) | 0.34             | 0.62 (0.57) | 0.26             | 0.48  |
| <sup>3</sup> J(H <sub>N</sub> ,C <sub>β</sub> ) φ <sub>2</sub>                 | 2.39             | 1.87 (2.71) | 2.30             | 1.82 (2.61) | 2.31             | 1.84 (2.66) | 1.38             | 1.98 (2.92) | -                | -     |
| <sup>1</sup> J(N,C <sub>α</sub> ) ψ <sub>2</sub>                               | 11.34            | 11.29       | 11.36            | 11.27       | 11.37            | 11.29       | 10.80            | 10.80       | 12.17            | 11.74 |
| <sup>2</sup> J(N,C <sub>α</sub> ) ψ <sub>2</sub>                               | 8.45             | 8.36        | 8.55             | 8.33        | 8.52             | 8.35        | 7.80             | 8.13        | 9.05             | 8.50  |
| <sup>3</sup> J(H <sub>N</sub> ,C <sub>α</sub> ) φ <sub>3</sub> ,ψ <sub>2</sub> | 0.65             | 0.60        | 0.68             | 0.61        | 0.66             | 0.62        | 0.75             | 0.56 (0.58) | 0.61             | 0.62  |
| <sup>3</sup> J(H <sub>N</sub> ,H <sub>α</sub> ) φ <sub>3</sub>                 | 6.52             | 5.76 (7.07) | 5.74             | 5.30 (6.19) | 5.66             | 5.38 (6.24) | 7.91             | 5.76 (7.07) | 5.87             | 5.77  |
| <sup>3</sup> J(H <sub>N</sub> ,C') φ <sub>3</sub>                              | 1.29             | 1.01 (0.28) | -                | 1.57 (1.01) | 1.20             | 1.58 (1.05) | 1.01             | 1.03 (0.30) | 0.99             | 1.18  |
| <sup>3</sup> J(H <sub>α</sub> ,C') φ <sub>3</sub>                              | 2.14             | 1.79 (1.86) | 1.86             | 1.88 (1.92) | 1.85             | 1.97 (2.01) | 2.45             | 1.79 (1.86) | 3.90             | 3.92  |
| <sup>3</sup> J(C',C') φ <sub>3</sub>                                           | -                | 0.51 (0.38) | -                | 0.72 (0.74) | -                | 0.73 (0.76) | -                | 0.52 (0.39) | -                | -     |
| <sup>3</sup> J(H <sub>N</sub> ,C <sub>β</sub> ) φ <sub>3</sub>                 | 2.02             | 2.08 (3.09) | 2.24             | 1.90 (2.75) | 2.20             | 1.87 (2.69) | 1.40             | 2.07 (3.07) | -                | -     |
| <sup>1</sup> J(N,C <sub>α</sub> ) ψ <sub>3</sub>                               |                  |             | 11.26            | 11.13       | 11.27            | 11.18       |                  |             |                  |       |
| <sup>2</sup> J(N,C <sub>α</sub> ) ψ <sub>3</sub>                               |                  |             | 8.40             | 8.16        | 8.29             | 8.22        |                  |             |                  |       |
| <sup>3</sup> J(H <sub>N</sub> ,C <sub>α</sub> ) φ <sub>3</sub> ,ψ <sub>3</sub> |                  |             | 0.69             | 0.60        | 0.56             | 0.61        |                  |             |                  |       |
| <sup>3</sup> J(H <sub>N</sub> ,H <sub>α</sub> ) φ <sub>3</sub>                 |                  |             | 5.98             | 5.41 (6.31) | 5.77             | 5.38 (6.25) |                  |             |                  |       |
| <sup>3</sup> J(H <sub>N</sub> ,C') φ <sub>3</sub>                              |                  |             | 1.15             | 1.57 (1.04) | 1.20             | 1.59 (1.06) |                  |             |                  |       |
| <sup>3</sup> J(H <sub>α</sub> ,C') φ <sub>3</sub>                              |                  |             | 1.89             | 1.90 (1.94) | 1.80             | 1.95 (1.99) |                  |             |                  |       |
| <sup>3</sup> J(C',C') φ <sub>3</sub>                                           |                  |             | -                | 0.77 (0.80) | -                | 0.75 (0.78) |                  |             |                  |       |
| <sup>3</sup> J(H <sub>N</sub> ,C <sub>β</sub> ) φ <sub>3</sub>                 |                  |             | 2.14             | 1.85 (2.66) | 2.23             | 1.86 (2.67) |                  |             |                  |       |
| <sup>1</sup> J(N,C <sub>α</sub> ) ψ <sub>4</sub>                               |                  |             | 11.25            | 11.14       | 11.22            | 11.19       |                  |             |                  |       |
| <sup>2</sup> J(N,C <sub>α</sub> ) ψ <sub>4</sub>                               |                  |             | 8.27             | 8.15        | 8.22             | 8.27        |                  |             |                  |       |
| <sup>3</sup> J(H <sub>N</sub> ,C <sub>α</sub> ) φ <sub>4</sub> ,ψ <sub>4</sub> |                  |             | 0.73             | 0.59        | -                | 0.62        |                  |             |                  |       |
| <sup>3</sup> J(H <sub>N</sub> ,H <sub>α</sub> ) φ <sub>4</sub>                 |                  |             | 6.54             | 5.82 (7.13) | 5.92             | 5.45 (6.36) |                  |             |                  |       |
| <sup>3</sup> J(H <sub>N</sub> ,C') φ <sub>4</sub>                              |                  |             | 1.16             | 1.00 (0.28) | 1.19             | 1.52 (0.98) |                  |             |                  |       |
| <sup>3</sup> J(H <sub>α</sub> ,C') φ <sub>4</sub>                              |                  |             | 2.19             | 1.81 (1.88) | 1.56             | 1.95 (2.00) |                  |             |                  |       |
| <sup>3</sup> J(C',C') φ <sub>4</sub>                                           |                  |             | -                | 0.52 (0.39) | -                | 0.72 (0.74) |                  |             |                  |       |
| <sup>3</sup> J(H <sub>N</sub> ,C <sub>β</sub> ) φ <sub>4</sub>                 |                  |             | 1.96             | 2.06 (3.06) | 2.23             | 1.88 (2.70) |                  |             |                  |       |
| <sup>1</sup> J(N,C <sub>α</sub> ) ψ <sub>5</sub>                               |                  |             |                  |             | 11.29            | 11.01       |                  |             |                  |       |
| <sup>2</sup> J(N,C <sub>α</sub> ) ψ <sub>5</sub>                               |                  |             |                  |             | 8.24             | 7.96        |                  |             |                  |       |
| <sup>3</sup> J(H <sub>N</sub> ,C <sub>α</sub> ) φ <sub>5</sub> ,ψ <sub>5</sub> |                  |             |                  |             | -                | 0.58        |                  |             |                  |       |
| <sup>3</sup> J(H <sub>N</sub> ,H <sub>α</sub> ) φ <sub>5</sub>                 |                  |             |                  |             | 6.04             | 5.53 (6.36) |                  |             |                  |       |
| <sup>3</sup> J(H <sub>N</sub> ,C') φ <sub>5</sub>                              |                  |             |                  |             | 1.10             | 1.58 (1.11) |                  |             |                  |       |
| <sup>3</sup> J(H <sub>α</sub> ,C') φ <sub>5</sub>                              |                  |             |                  |             | 1.67             | 2.06 (2.13) |                  |             |                  |       |
| <sup>3</sup> J(C',C') φ <sub>5</sub>                                           |                  |             |                  |             | -                | 0.78 (0.82) |                  |             |                  |       |
| <sup>3</sup> J(H <sub>N</sub> ,C <sub>β</sub> ) φ <sub>5</sub>                 |                  |             |                  |             | 2.21             | 1.80 (2.56) |                  |             |                  |       |
| <sup>1</sup> J(N,C <sub>α</sub> ) ψ <sub>6</sub>                               |                  |             |                  |             | 11.29            | 11.13       |                  |             |                  |       |
| <sup>2</sup> J(N,C <sub>α</sub> ) ψ <sub>6</sub>                               |                  |             |                  |             | 8.18             | 8.14        |                  |             |                  |       |
| <sup>3</sup> J(H <sub>N</sub> ,C <sub>α</sub> ) φ <sub>6</sub> ,ψ <sub>6</sub> |                  |             |                  |             | 0.59             | 0.59        |                  |             |                  |       |
| <sup>3</sup> J(H <sub>N</sub> ,H <sub>α</sub> ) φ <sub>6</sub>                 |                  |             |                  |             | 6.60             | 5.79 (7.11) |                  |             |                  |       |
| <sup>3</sup> J(H <sub>N</sub> ,C') φ <sub>6</sub>                              |                  |             |                  |             | 1.25             | 1.01 (0.28) |                  |             |                  |       |
| <sup>3</sup> J(H <sub>α</sub> ,C') φ <sub>6</sub>                              |                  |             |                  |             | 2.03             | 1.80 (1.87) |                  |             |                  |       |
| <sup>3</sup> J(C',C') φ <sub>6</sub>                                           |                  |             |                  |             | -                | 0.52 (0.39) |                  |             |                  |       |
| <sup>3</sup> J(H <sub>N</sub> ,C <sub>β</sub> ) φ <sub>6</sub>                 |                  |             |                  |             | 1.99             | 2.07 (3.07) |                  |             |                  |       |

**Table S10:** NMR J-coupling constants for Ala<sub>5</sub> from experiment<sup>7</sup> and simulations with different force fields. Flavodoxin-based Karplus parameters<sup>8</sup> were used in all cases.

|                                                 |                                | <i>NMR</i> | <i>C36</i> | <i>C22/CMAP</i> | <i>C22/MP2</i> | <i>Amber 99SB</i> | <i>OPLS</i> | <i>Gromos 53A6</i> |
|-------------------------------------------------|--------------------------------|------------|------------|-----------------|----------------|-------------------|-------------|--------------------|
| <sup>2</sup> J(N,C <sub>α</sub> )               | ψ <sub>1</sub>                 | 9.20       | 8.60       | 8.59            | 8.60           | 8.54              | 8.64        | 8.61               |
| <sup>3</sup> J(H <sub>N</sub> ,C <sub>α</sub> ) | φ <sub>1</sub> ,ψ <sub>1</sub> | 0.67       | 0.57       | 0.61            | 0.49           | 0.70              | 0.68        | 0.71               |
| <sup>3</sup> J(H <sub>N</sub> ,H <sub>α</sub> ) | φ <sub>1</sub>                 | 5.59       | 5.40       | 5.85            | 3.79           | 6.26              | 7.07        | 6.90               |
| <sup>3</sup> J(H <sub>N</sub> ,C') <sub>β</sub> | φ <sub>2</sub>                 | 1.13       | 1.62       | 1.60            | 2.30           | 1.35              | 0.90        | 1.17               |
| <sup>3</sup> J(H <sub>α</sub> ,C')              | φ <sub>2</sub>                 | 1.85       | 1.97       | 1.96            | 1.72           | 1.97              | 2.21        | 2.23               |
| <sup>3</sup> J(C',C')                           | φ <sub>2</sub>                 | 0.19       | 0.78       | 1.04            | 0.52           | 1.01              | 0.91        | 1.00               |
| <sup>3</sup> J(H <sub>N</sub> ,C <sub>β</sub> ) | φ <sub>2</sub>                 | 2.30       | 1.82       | 1.60            | 2.12           | 1.58              | 1.56        | 1.46               |
| <sup>1</sup> J(N,C <sub>α</sub> )               | ψ <sub>1</sub>                 | 11.36      | 11.27      | 11.10           | 11.18          | 11.40             | 11.33       | 10.74              |
| <sup>2</sup> J(N,C <sub>α</sub> )               | ψ <sub>1</sub>                 | 8.55       | 8.33       | 7.95            | 8.21           | 8.28              | 8.33        | 8.21               |
| <sup>3</sup> J(H <sub>N</sub> ,C <sub>α</sub> ) | φ <sub>1</sub> ,ψ <sub>2</sub> | 0.68       | 0.61       | 0.58            | 0.55           | 0.64              | 0.64        | 0.65               |
| <sup>3</sup> J(H <sub>N</sub> ,H <sub>α</sub> ) | φ <sub>1</sub>                 | 5.74       | 5.30       | 5.97            | 3.91           | 6.41              | 7.12        | 6.81               |
| <sup>3</sup> J(H <sub>N</sub> ,C')              | φ <sub>1</sub>                 | -          | 1.57       | 1.51            | 2.21           | 1.39              | 0.88        | 1.17               |
| <sup>3</sup> J(H <sub>α</sub> ,C')              | φ <sub>1</sub>                 | 1.86       | 1.88       | 2.23            | 1.74           | 2.37              | 2.23        | 2.26               |
| <sup>3</sup> J(C',C')                           | φ <sub>1</sub>                 | -          | 0.72       | 0.90            | 0.52           | 0.90              | 0.90        | 0.94               |
| <sup>3</sup> J(H <sub>N</sub> ,C <sub>β</sub> ) | φ <sub>1</sub>                 | 2.24       | 1.90       | 1.65            | 2.12           | 1.56              | 1.56        | 1.51               |
| <sup>1</sup> J(N,C <sub>α</sub> )               | ψ <sub>2</sub>                 | 11.26      | 11.13      | 10.74           | 11.03          | 11.05             | 11.17       | 10.59              |
| <sup>2</sup> J(N,C <sub>α</sub> )               | ψ <sub>2</sub>                 | 8.40       | 8.16       | 7.42            | 8.06           | 7.75              | 8.20        | 8.11               |
| <sup>3</sup> J(H <sub>N</sub> ,C <sub>α</sub> ) | φ <sub>2</sub> ,ψ <sub>3</sub> | 0.69       | 0.60       | 0.52            | 0.54           | 0.59              | 0.63        | 0.65               |
| <sup>3</sup> J(H <sub>N</sub> ,H <sub>α</sub> ) | φ <sub>2</sub>                 | 5.98       | 5.41       | 6.20            | 4.35           | 6.62              | 7.14        | 6.98               |
| <sup>3</sup> J(H <sub>N</sub> ,C')              | φ <sub>2</sub>                 | 1.15       | 1.57       | 1.46            | 2.13           | 1.23              | 0.89        | 1.15               |
| <sup>3</sup> J(H <sub>α</sub> ,C')              | φ <sub>2</sub>                 | 1.89       | 1.90       | 2.11            | 2.08           | 2.07              | 2.23        | 2.32               |
| <sup>3</sup> J(C',C')                           | φ <sub>2</sub>                 | -          | 0.77       | 1.03            | 0.55           | 1.04              | 0.91        | 0.99               |
| <sup>3</sup> J(H <sub>N</sub> ,C <sub>β</sub> ) | φ <sub>2</sub>                 | 2.14       | 1.85       | 1.55            | 2.01           | 1.51              | 1.54        | 1.44               |
| <sup>1</sup> J(N,C <sub>α</sub> )               | ψ <sub>1</sub>                 | 11.25      | 11.14      | 10.88           | 10.89          | 11.20             | 11.06       | 10.58              |
| <sup>2</sup> J(N,C <sub>α</sub> )               | ψ <sub>1</sub>                 | 8.27       | 8.15       | 7.58            | 7.82           | 7.98              | 8.10        | 8.12               |
| <sup>3</sup> J(H <sub>N</sub> ,C <sub>α</sub> ) | φ <sub>2</sub> ,ψ <sub>1</sub> | 0.73       | 0.59       | 0.49            | 0.55           | 0.58              | 0.63        | 0.68               |
| <sup>3</sup> J(H <sub>N</sub> ,H <sub>α</sub> ) | φ <sub>2</sub>                 | 6.54       | 5.82       | 5.83            | 5.82           | 6.06              | 7.52        | 7.66               |
| <sup>3</sup> J(H <sub>N</sub> ,C')              | φ <sub>2</sub>                 | 1.16       | 1.00       | 0.99            | 1.00           | 1.75              | 0.90        | 1.04               |
| <sup>3</sup> J(H <sub>α</sub> ,C')              | φ <sub>2</sub>                 | 2.19       | 1.81       | 1.81            | 1.81           | 2.52              | 2.40        | 2.47               |
| <sup>3</sup> J(C',C')                           | φ <sub>2</sub>                 | -          | 0.52       | 0.52            | 0.52           | 0.84              | 1.03        | 1.19               |
| <sup>3</sup> J(H <sub>N</sub> ,C <sub>β</sub> ) | φ <sub>2</sub>                 | 1.96       | 2.06       | 2.06            | 2.06           | 1.52              | 1.37        | 1.20               |



**Table S11.** Old and new dihedral parameters for Glycine termini. Torsion potentials are of the form  $V_n(\theta) = k_n(1 + \cos[n\theta - \theta_0])$ , where  $\theta$  is the torsion angle as defined,  $\theta_0$  is a phase offset and  $k_n$  is the force constant, which was optimized, and the multiplicity  $n=1$ .

| Atom types    | Backbone torsion | Old $k_\theta$<br>[kcal/mol] | Old $\theta_0$ | New $k_\theta$<br>[kcal/mol] | New $\theta_0$ |
|---------------|------------------|------------------------------|----------------|------------------------------|----------------|
| NH3-CT2-C-NH1 | N-ter, $\psi$    | 0.4                          | 0°             | 1.0                          | 0°             |
| CC-CT2-NH1-C  | C-ter, $\phi$    | 0.2                          | 180°           | 2.0                          | 180°           |

**Table S12.** Scalar couplings of GPGG

| Residue | $J$ -coupling type  | Torsion probed | $J$ (expt) | $J$ (ff99SB) | $J$ (C22/CMAP) | $J$ (C36) |
|---------|---------------------|----------------|------------|--------------|----------------|-----------|
| Pro 2   | $^3J_{\text{HaC}}$  | $\phi_2$       | 1.3        | 1.22         | 1.12           | 1.00      |
| Gly 3   | $^3J_{\text{HaC}}$  | $\phi_3$       | 4.1        | 4.27         | 5.01           | 3.96      |
| Gly 4   | $^3J_{\text{HaC}}$  | $\phi_4$       | 3.7        | 2.49         | 1.04           | 2.43      |
| Gly 4   | $^3J_{\text{HNC}}$  | $\phi_4$       | 1.1        | 1.68         | 2.55           | 1.59      |
| Gly 3   | $^3J_{\text{HNHa}}$ | $\phi_3$       | 6.3        | 5.92         | 6.58           | 6.32      |
| Gly 4   | $^3J_{\text{HNHa}}$ | $\phi_4$       | 6.0        | 4.49         | 2.03           | 4.18      |

**Table S13)** Scalar couplings of central Ala residues in the HEWL19 peptide.

|                    |                                                     | Expt  |      | Amber<br>ff99SB | Amber<br>ff99SB* | C22/CMAP | C36   |
|--------------------|-----------------------------------------------------|-------|------|-----------------|------------------|----------|-------|
| A9                 | $^1\text{JNC}\alpha$ ( $\psi_9$ )                   | 10.54 | 0.59 | 10.84           | 10.53            | 9.90     | 10.40 |
| A10                | $^1\text{JNC}\alpha$ ( $\psi_{10}$ )                | 10.58 | 0.59 | 10.84           | 10.27            | 9.79     | 10.35 |
| A11                | $^1\text{JNC}\alpha$ ( $\psi_{11}$ )                | 10.57 | 0.59 | 10.64           | 10.21            | 9.78     | 10.40 |
| A10                | $^2\text{JNC}\alpha$ ( $\psi_9$ )                   | 7.24  | 0.50 | 7.50            | 7.06             | 6.49     | 7.02  |
| A11                | $^2\text{JNC}\alpha$ ( $\psi_{10}$ )                | 7.02  | 0.50 | 7.54            | 6.64             | 6.37     | 6.91  |
| M12                | $^2\text{JNC}\alpha$ ( $\psi_{11}$ )                | 7.17  | 0.50 | 7.01            | 6.57             | 6.33     | 7.06  |
| A9                 | $^3\text{JH}\alpha$ C( $\phi_9$ )                   | 2.06  | 0.38 | 2.47            | 1.76             | 1.15     | 1.93  |
| A10                | $^3\text{JH}\alpha$ C( $\phi_{10}$ )                | 1.72  | 0.38 | 2.55            | 1.82             | 1.18     | 2.10  |
| A11                | $^3\text{JH}\alpha$ C( $\phi_{11}$ )                | 2.20  | 0.38 | 2.87            | 2.16             | 1.09     | 2.32  |
| A9                 | $^3\text{JHNC}$ ( $\phi_9$ )                        | 1.39  | 0.59 | 1.05            | 0.65             | 0.76     | 1.03  |
| A10                | $^3\text{JHNC}$ ( $\phi_{10}$ )                     | 1.33  | 0.59 | 1.10            | 0.65             | 0.77     | 0.88  |
| A11                | $^3\text{JHNC}$ ( $\phi_{11}$ )                     | 1.09  | 0.59 | 1.22            | 0.77             | 0.85     | 0.97  |
| A9                 | $^3\text{JHNC}\beta$ ( $\phi_9$ )                   | 2.26  | 0.39 | 2.03            | 2.74             | 3.68     | 2.77  |
| A10                | $^3\text{JHNC}\beta$ ( $\phi_{10}$ )                | 2.19  | 0.39 | 2.23            | 3.01             | 3.73     | 2.86  |
| A11                | $^3\text{JHNC}\beta$ ( $\phi_{11}$ )                | 2.21  | 0.39 | 2.31            | 2.37             | 3.75     | 2.73  |
| A9                 | $^3\text{JHNH}\alpha$ ( $\phi_9$ )                  | 5.18  | 0.91 | 7.49            | 6.22             | 4.94     | 6.15  |
| A10                | $^3\text{JHNH}\alpha$ ( $\phi_{10}$ )               | 5.10  | 0.91 | 7.08            | 6.46             | 4.83     | 6.19  |
| A11                | $^3\text{JHNH}\alpha$ ( $\phi_{11}$ )               | 5.67  | 0.91 | 6.67            | 7.45             | 4.78     | 6.23  |
| A10                | $^3\text{JHNC}\alpha$ ( $\phi_{10}$ , $\psi_9$ )    | 0.46  | 0.10 | 0.52            | 0.39             | 0.19     | 0.37  |
| A11                | $^3\text{JHNC}\alpha$ ( $\phi_{11}$ , $\psi_{10}$ ) | 0.43  | 0.10 | 0.49            | 0.38             | 0.16     | 0.38  |
| M12                | $^3\text{JHNC}\alpha$ ( $\phi_{12}$ , $\psi_{11}$ ) | 0.43  | 0.10 | 0.49            | 0.38             | 0.16     | 0.41  |
| $\chi^2(\text{J})$ |                                                     |       |      | 1.2             | 1.0              | 4.7      | 0.6   |

Table S14) New atom types and parameters in the C36 force field.

```

MASS      51 CT2A  12.01100

BONDS
CT2A CT1   222.500    1.5380
CT2  CT2A  222.500    1.5300
CT2A HA2   309.000    1.1110
CT2A CPH1  229.630    1.5000
CT2A CC    200.000    1.5220

ANGLES
CT2A CT1  CC      52.000   108.0000
CT2A CT2  CD      52.000   108.0000
NH1  CT1  CT2A    70.000   113.5000
HB1  CT1  CT2A    35.000   111.0000
CT2A CT1  C       52.000   108.0000
CT1  CT2A HA2     26.500   110.1000   22.53   2.17900
CT1  CT2A CT2     58.350   113.5000   11.16   2.56100
HA2  CT2A HA2     35.500   109.0000    5.40   1.80200
HA2  CT2A CT2     26.500   110.1000   22.53   2.17900
CT2A CT2  HA2     26.500   110.1000   22.53   2.17900
CT2A CT2  CC      52.000   108.0000
CT1  CT2A CPH1    58.350   113.0000
HA2  CT2A CPH1    33.430   109.5000
CT2A CPH1 CPH1    45.800   130.0000
CT2A CPH1 NR3     45.800   122.0000
CT1  CT2A CC      52.000   108.0000
HA2  CT2A CC      33.000   109.5000   30.00   2.16300
OC   CC   CT2A    40.000   118.0000   50.00   2.38800
NH3  CT1  CT2A    67.700   110.0000
CT2A CT1  CD      52.000   108.0000

DIHEDRALS
!Glu/Hsp, CT2A terms
NH1  CT1  CT2A HA2      0.2000  3      0.00
CT1  CT2A CT2  HA2      0.1900  3      0.00
HB1  CT1  CT2A HA2      0.2000  3      0.00
HB1  CT1  CT2A CT2      0.2000  3      0.00
HA2  CT2A CT1  C        0.2000  3      0.00
HA2  CT2A CT1  CC       0.2000  3      0.00
HA2  CT2A CT2  HA2      0.1900  3      0.00
HA2  CT2A CT2  CC       0.1900  3      0.00
HB1  CT1  CT2A CPH1     0.2000  3      0.00
C    NH1  CT1  CT2A     1.8000  1      0.00
H    NH1  CT1  CT2A     0.0000  1      0.00
CT2A CT1  C    O        1.4000  1      0.00
CT2A CT1  C    NH1     0.0000  1      0.00
CT2A CT1  C    N        0.0000  1      0.00
! Glup
CT1  CT2A CT2  CD      0.1900  3      0.00
HA2  CT2A CT2  CD      0.1900  3      0.00
CT2A CPH1 CPH1 HR1     1.0000  2     180.00
CT2A CPH1 CPH1 NR3     2.5000  2     180.00
CT2A CPH1 NR3  H       3.0000  2     180.00
CT2A CPH1 NR3  CPH2    2.5000  2     180.00
HA2  CT2A CPH1 CPH1    0.0000  3      0.00
HA2  CT2A CPH1 NR3     0.1900  3      0.00
! Fit dihedrals

```

```

! Group-fitted for Lys/Arg/Gln/Met
C   CT1  CT2  CT2      0.3500  1  180.00
C   CT1  CT2  CT2      0.4200  2  180.00
C   CT1  CT2  CT2      1.9100  3  180.00
CT2 CT2  CT1  NH1      0.8800  1  180.00
CT2 CT2  CT1  NH1      0.0000  2  180.00
CT2 CT2  CT1  NH1      1.9000  3    0.00
CC  CT2  CT2  CT1      1.8400  1  180.00
CC  CT2  CT2  CT1      0.8400  2  180.00
CC  CT2  CT2  CT1      0.3900  3  180.00
CT1 CT2  CT2  CT2      0.6300  1  180.00
CT1 CT2  CT2  CT2      0.0100  2    0.00
CT1 CT2  CT2  CT2      0.1500  3    0.00
CT1 CT2  CT2  S       0.1400  1  180.00
CT1 CT2  CT2  S       0.5400  2    0.00
CT1 CT2  CT2  S       0.6900  3    0.00
! Fitted Asn
C   CT1  CT2  CC       1.4100  1  180.00
C   CT1  CT2  CC       1.2900  2  180.00
C   CT1  CT2  CC       0.5900  3  180.00
CC  CT2  CT1  NH1      0.2800  1  180.00
CC  CT2  CT1  NH1      0.5000  2  180.00
CC  CT2  CT1  NH1      0.3800  3    0.00
CT1 CT2  CC   NH2      0.6200  1  180.00
CT1 CT2  CC   NH2      0.6600  2  180.00
CT1 CT2  CC   NH2      0.7200  3  180.00
CT1 CT2  CC   O       0.4200  1  180.00
CT1 CT2  CC   O       0.1500  2  180.00
CT1 CT2  CC   O       0.9500  3  180.00
! Fitted Asp
C   CT1  CT2A  CC      1.6100  1  180.00
C   CT1  CT2A  CC      1.2900  2  180.00
C   CT1  CT2A  CC      0.5900  3  180.00
CC  CT2A  CT1  NH1      0.6800  1  180.00
CC  CT2A  CT1  NH1      0.1000  2  180.00
CC  CT2A  CT1  NH1      0.3800  3    0.00
CT1 CT2A  CC   OC      0.8400  1    0.00
CT1 CT2A  CC   OC      0.9800  2  180.00
CT1 CT2A  CC   OC      1.4600  3    0.00
! Fitted Cys
CT1 CT2  S    HS       0.2000  1    0.00
CT1 CT2  S    HS       0.6500  2    0.00
CT1 CT2  S    HS       0.2200  3    0.00
C   CT1  CT2  S       0.2400  1  180.00
C   CT1  CT2  S       0.7500  2  180.00
C   CT1  CT2  S       1.3500  3  180.00
NH1 CT1  CT2  S       0.3400  1    0.00
NH1 CT1  CT2  S       0.5000  2  180.00
NH1 CT1  CT2  S       1.4300  3    0.00
! Fitted Glu
CC  CT2  CT2A  CT1      0.0000  1  180.00
CC  CT2  CT2A  CT1      0.3800  2  180.00
CC  CT2  CT2A  CT1      0.5900  3  180.00
C   CT1  CT2A  CT2      0.1100  1    0.00
C   CT1  CT2A  CT2      0.9800  2  180.00
C   CT1  CT2A  CT2      1.6000  3  180.00
CC  CT1  CT2A  CT2      1.6000  3  180.00
CT2 CT2A  CT1  NH1      0.3000  1    0.00
CT2 CT2A  CT1  NH1      0.3500  2    0.00
CT2 CT2A  CT1  NH1      1.7600  3    0.00
! Group-fitted for Hsd/Hse

```

|                            |      |      |      |        |   |        |
|----------------------------|------|------|------|--------|---|--------|
| CPH1                       | CPH1 | CT2  | CT1  | 1.7400 | 1 | 0.00   |
| CPH1                       | CPH1 | CT2  | CT1  | 0.1500 | 2 | 0.00   |
| CPH1                       | CPH1 | CT2  | CT1  | 0.7700 | 3 | 180.00 |
| CT1                        | CT2  | CPH1 | NR1  | 1.4900 | 1 | 0.00   |
| CT1                        | CT2  | CPH1 | NR1  | 0.0900 | 2 | 180.00 |
| CT1                        | CT2  | CPH1 | NR1  | 0.7900 | 3 | 180.00 |
| CT1                        | CT2  | CPH1 | NR2  | 1.0900 | 1 | 0.00   |
| CT1                        | CT2  | CPH1 | NR2  | 0.0900 | 2 | 0.00   |
| CT1                        | CT2  | CPH1 | NR2  | 0.6700 | 3 | 180.00 |
| C                          | CT1  | CT2  | CPH1 | 0.1800 | 1 | 180.00 |
| C                          | CT1  | CT2  | CPH1 | 0.6400 | 2 | 180.00 |
| C                          | CT1  | CT2  | CPH1 | 0.8700 | 3 | 180.00 |
| CPH1                       | CT2  | CT1  | NH1  | 0.0000 | 1 | 0.00   |
| CPH1                       | CT2  | CT1  | NH1  | 0.0000 | 2 | 180.00 |
| CPH1                       | CT2  | CT1  | NH1  | 0.9000 | 3 | 0.00   |
| ! Group-fitted for Hsp     |      |      |      |        |   |        |
| CPH1                       | CPH1 | CT2A | CT1  | 2.0400 | 1 | 0.00   |
| CPH1                       | CPH1 | CT2A | CT1  | 0.4400 | 2 | 0.00   |
| CPH1                       | CPH1 | CT2A | CT1  | 0.1300 | 3 | 180.00 |
| CT1                        | CT2A | CPH1 | NR3  | 0.5300 | 1 | 180.00 |
| CT1                        | CT2A | CPH1 | NR3  | 0.4200 | 2 | 180.00 |
| CT1                        | CT2A | CPH1 | NR3  | 0.3000 | 3 | 180.00 |
| C                          | CT1  | CT2A | CPH1 | 1.7500 | 1 | 180.00 |
| C                          | CT1  | CT2A | CPH1 | 0.1300 | 2 | 0.00   |
| C                          | CT1  | CT2A | CPH1 | 1.8600 | 3 | 180.00 |
| CPH1                       | CT2A | CT1  | NH1  | 1.0900 | 1 | 180.00 |
| CPH1                       | CT2A | CT1  | NH1  | 0.2200 | 2 | 180.00 |
| CPH1                       | CT2A | CT1  | NH1  | 2.3200 | 3 | 0.00   |
| ! Group-fitted for Ile/Thr |      |      |      |        |   |        |
| CT1                        | CT1  | CT2  | CT3  | 0.3800 | 1 | 180.00 |
| CT1                        | CT1  | CT2  | CT3  | 0.1300 | 2 | 180.00 |
| CT1                        | CT1  | CT2  | CT3  | 0.2900 | 3 | 180.00 |
| C                          | CT1  | CT1  | CT2  | 0.1000 | 1 | 180.00 |
| C                          | CT1  | CT1  | CT2  | 0.5200 | 2 | 180.00 |
| C                          | CT1  | CT1  | CT2  | 0.2900 | 3 | 180.00 |
| CT2                        | CT1  | CT1  | NH1  | 0.1200 | 1 | 180.00 |
| CT2                        | CT1  | CT1  | NH1  | 0.3600 | 2 | 180.00 |
| CT2                        | CT1  | CT1  | NH1  | 0.4100 | 3 | 0.00   |
| ! Fitted Leu               |      |      |      |        |   |        |
| CT1                        | CT2  | CT1  | CT3  | 0.0500 | 1 | 0.00   |
| CT1                        | CT2  | CT1  | CT3  | 0.1000 | 2 | 180.00 |
| CT1                        | CT2  | CT1  | CT3  | 0.0100 | 3 | 180.00 |
| C                          | CT1  | CT2  | CT1  | 0.3200 | 1 | 180.00 |
| C                          | CT1  | CT2  | CT1  | 0.6100 | 2 | 180.00 |
| C                          | CT1  | CT2  | CT1  | 0.7200 | 3 | 180.00 |
| CT1                        | CT2  | CT1  | NH1  | 0.4800 | 1 | 180.00 |
| CT1                        | CT2  | CT1  | NH1  | 0.4200 | 2 | 180.00 |
| CT1                        | CT2  | CT1  | NH1  | 0.6500 | 3 | 0.00   |
| ! Group-fitted for Phe/Tyr |      |      |      |        |   |        |
| CA                         | CA   | CT2  | CT1  | 1.0700 | 1 | 0.00   |
| CA                         | CA   | CT2  | CT1  | 0.2400 | 2 | 180.00 |
| CA                         | CA   | CT2  | CT1  | 0.1700 | 3 | 180.00 |
| C                          | CT1  | CT2  | CA   | 1.2800 | 1 | 180.00 |
| C                          | CT1  | CT2  | CA   | 0.9400 | 2 | 180.00 |
| C                          | CT1  | CT2  | CA   | 1.5700 | 3 | 180.00 |
| CA                         | CT2  | CT1  | NH1  | 0.5200 | 1 | 180.00 |
| CA                         | CT2  | CT1  | NH1  | 0.6200 | 2 | 180.00 |
| CA                         | CT2  | CT1  | NH1  | 1.5800 | 3 | 0.00   |
| ! Fitted Ser               |      |      |      |        |   |        |
| CT1                        | CT2  | OH1  | H    | 0.0200 | 1 | 0.00   |
| CT1                        | CT2  | OH1  | H    | 0.5600 | 2 | 0.00   |

|                            |     |     |     |        |   |        |
|----------------------------|-----|-----|-----|--------|---|--------|
| CT1                        | CT2 | OH1 | H   | 0.4900 | 3 | 0.00   |
| C                          | CT1 | CT2 | OH1 | 0.6500 | 1 | 180.00 |
| C                          | CT1 | CT2 | OH1 | 0.2500 | 2 | 180.00 |
| C                          | CT1 | CT2 | OH1 | 1.1700 | 3 | 180.00 |
| NH1                        | CT1 | CT2 | OH1 | 0.1800 | 1 | 180.00 |
| NH1                        | CT1 | CT2 | OH1 | 0.1900 | 2 | 180.00 |
| NH1                        | CT1 | CT2 | OH1 | 1.4600 | 3 | 0.00   |
| ! Group-fitted for Ile/Thr |     |     |     |        |   |        |
| CT1                        | CT1 | OH1 | H   | 0.1800 | 1 | 0.00   |
| CT1                        | CT1 | OH1 | H   | 0.0600 | 2 | 0.00   |
| CT1                        | CT1 | OH1 | H   | 0.2500 | 3 | 0.00   |
| C                          | CT1 | CT1 | OH1 | 0.7900 | 1 | 180.00 |
| C                          | CT1 | CT1 | OH1 | 0.3900 | 2 | 180.00 |
| C                          | CT1 | CT1 | OH1 | 0.9900 | 3 | 180.00 |
| NH1                        | CT1 | CT1 | OH1 | 0.0900 | 1 | 0.00   |
| NH1                        | CT1 | CT1 | OH1 | 0.1900 | 2 | 180.00 |
| NH1                        | CT1 | CT1 | OH1 | 0.1700 | 3 | 0.00   |
| ! Fitted Trp side-chain    |     |     |     |        |   |        |
| CA                         | CY  | CT2 | CT1 | 0.0300 | 1 | 0.00   |
| CA                         | CY  | CT2 | CT1 | 0.5500 | 2 | 0.00   |
| CA                         | CY  | CT2 | CT1 | 0.3900 | 3 | 180.00 |
| CPT                        | CY  | CT2 | CT1 | 0.3600 | 1 | 180.00 |
| CPT                        | CY  | CT2 | CT1 | 0.0500 | 2 | 0.00   |
| CPT                        | CY  | CT2 | CT1 | 0.1900 | 3 | 180.00 |
| C                          | CT1 | CT2 | CY  | 1.0900 | 1 | 180.00 |
| C                          | CT1 | CT2 | CY  | 0.5000 | 2 | 180.00 |
| C                          | CT1 | CT2 | CY  | 1.1700 | 3 | 180.00 |
| CY                         | CT2 | CT1 | NH1 | 0.2900 | 1 | 180.00 |
| CY                         | CT2 | CT1 | NH1 | 0.6600 | 2 | 180.00 |
| CY                         | CT2 | CT1 | NH1 | 1.1700 | 3 | 0.00   |
| ! Fitted Val               |     |     |     |        |   |        |
| C                          | CT1 | CT1 | CT3 | 0.1400 | 1 | 180.00 |
| C                          | CT1 | CT1 | CT3 | 0.2600 | 2 | 180.00 |
| C                          | CT1 | CT1 | CT3 | 0.3300 | 3 | 180.00 |
| CT3                        | CT1 | CT1 | NH1 | 0.1800 | 1 | 0.00   |
| CT3                        | CT1 | CT1 | NH1 | 0.0600 | 2 | 0.00   |
| CT3                        | CT1 | CT1 | NH1 | 0.5900 | 3 | 0.00   |

Lennard-Jones parameters

|      |     |         |        |     |       |     |
|------|-----|---------|--------|-----|-------|-----|
| CT1  | 0.0 | -0.0320 | 2.000  | 0.0 | -0.01 | 1.9 |
| CT2  | 0.0 | -0.0560 | 2.010  | 0.0 | -0.01 | 1.9 |
| CT2A | 0.0 | -0.0560 | 2.010  | 0.0 | -0.01 | 1.9 |
| CT3  | 0.0 | -0.0780 | 2.040  | 0.0 | -0.01 | 1.9 |
| HA1  | 0.0 | -0.045  | 1.3400 |     |       |     |
| HA2  | 0.0 | -0.034  | 1.3400 |     |       |     |
| HA3  | 0.0 | -0.024  | 1.3400 |     |       |     |

CMAP

! 2D grid correction data.

! alanine map

|   |     |     |   |     |     |   |     |    |
|---|-----|-----|---|-----|-----|---|-----|----|
| C | NH1 | CT1 | C | NH1 | CT1 | C | NH1 | 24 |
|---|-----|-----|---|-----|-----|---|-----|----|

! phi = -180.0

|           |           |           |           |           |
|-----------|-----------|-----------|-----------|-----------|
| 0.126790  | 0.768700  | 0.971260  | 1.250970  | 2.121010  |
| 2.720430  | 2.089440  | 1.789790  | 0.780870  | -0.688474 |
| 1.001130  | -2.200520 | -4.827670 | -4.821447 | -4.913223 |
| -3.591106 | -2.766446 | -2.784200 | -2.454589 | -2.346991 |
| -2.335350 | -1.522656 | -0.951542 | -0.036650 |           |

! phi = -165.0

|           |          |          |          |          |
|-----------|----------|----------|----------|----------|
| -0.127133 | 1.377090 | 1.577020 | 1.872290 | 2.398990 |
|-----------|----------|----------|----------|----------|

|                |           |           |           |           |
|----------------|-----------|-----------|-----------|-----------|
| 2.486630       | 2.436754  | 1.929070  | 1.086456  | 0.643400  |
| 0.258676       | -2.800440 | -4.009477 | -4.135306 | -3.420090 |
| -2.602140      | -2.299128 | -1.501241 | -1.101780 | -0.861434 |
| -0.640168      | -0.207701 | -1.076344 | -1.122030 |           |
| ! phi = -150.0 |           |           |           |           |
| 0.084069       | 1.420317  | 1.624350  | 2.047200  | 2.653910  |
| 2.716410       | 2.321416  | 1.985454  | 1.557466  | 2.463293  |
| -0.225720      | -1.815886 | -2.583256 | -3.006154 | -2.551995 |
| -1.890683      | -1.354215 | -0.727243 | 0.068512  | -0.225016 |
| -0.765479      | -1.283444 | -1.293226 | -0.816303 |           |
| ! phi = -135.0 |           |           |           |           |
| 0.927992       | 1.521370  | 2.242218  | 2.546305  | 3.111384  |
| 2.918410       | 2.460813  | 2.187970  | 2.058314  | 1.852278  |
| 0.115935       | -1.183897 | -1.995479 | -2.278329 | -1.959136 |
| -1.340467      | -0.932949 | 0.021790  | 0.313725  | -0.517358 |
| -1.152891      | -0.983285 | -0.566518 | -0.442565 |           |
| ! phi = -120.0 |           |           |           |           |
| 1.357468       | 1.959160  | 2.698894  | 3.037857  | 3.698960  |
| 3.558453       | 2.639296  | 2.773853  | 2.719664  | 1.627997  |
| 0.705667       | -0.785637 | -2.118268 | -2.628489 | -1.803113 |
| -0.425969      | -0.062320 | 0.439040  | 0.910952  | -0.546994 |
| -0.968118      | -0.856791 | -0.250116 | 0.449309  |           |
| ! phi = -105.0 |           |           |           |           |
| 2.045006       | 2.544424  | 2.818030  | 3.088582  | 3.370620  |
| 3.551568       | 3.073520  | 2.903794  | 2.956634  | 2.124759  |
| 0.906487       | -0.823628 | -2.090819 | -2.241579 | -1.456524 |
| 0.206160       | 0.082195  | 0.771710  | 1.040241  | -0.124647 |
| -0.316550      | -0.164333 | 0.314474  | 0.733747  |           |
| ! phi = -90.0  |           |           |           |           |
| 1.451735       | 2.748481  | 2.738185  | 3.156796  | 3.450028  |
| 3.344157       | 3.180200  | 3.898724  | 3.335030  | 2.440579  |
| 0.912671       | -0.606502 | -1.511772 | -1.620864 | -0.962798 |
| -0.020653      | 0.415153  | 0.908250  | 0.459433  | 0.145910  |
| -0.071054      | 0.017622  | 0.280839  | 0.748823  |           |
| ! phi = -75.0  |           |           |           |           |
| 1.378160       | 3.345958  | 2.352424  | 3.063543  | 3.814070  |
| 3.700796       | 3.580310  | 4.212293  | 3.536425  | 1.693809  |
| 0.095172       | -0.682452 | -0.123614 | -0.427765 | -0.598368 |
| 0.226352       | 0.423308  | 0.301999  | 0.551890  | 0.191719  |
| -0.253585      | -0.190548 | -0.253412 | 0.468922  |           |
| ! phi = -60.0  |           |           |           |           |
| 0.237754       | 1.229980  | 1.716960  | 3.168570  | 4.208190  |
| 4.391860       | 4.276080  | 3.673107  | 2.272295  | -0.482789 |
| -0.406695      | -0.038919 | -0.357600 | -0.823341 | -0.173146 |
| 0.139806       | 0.267796  | 0.322420  | 0.309664  | -0.666399 |
| -0.948631      | -1.534365 | -1.479968 | -0.204264 |           |
| ! phi = -45.0  |           |           |           |           |
| -1.184837      | 0.078060  | 2.347410  | 4.211350  | 5.376000  |
| 5.389940       | 4.380200  | 2.461506  | 1.123713  | 0.107016  |
| 0.007574       | -0.149443 | -0.797230 | -0.582210 | 0.082910  |
| 0.271580       | -0.045570 | 0.379430  | 0.247770  | -0.890956 |
| -1.582430      | -1.954532 | -1.980965 | -2.000433 |           |

```

! phi = -30.0
-1.174720      1.067030      4.180460      6.741610      6.070770
 4.806470      2.783340      1.320806      0.765978     -0.008448
 0.276860     -0.707140      1.314360      1.522590      1.915550
 2.223490      0.194290      0.534000      0.331780     -1.595147
-2.849141     -3.550465     -3.277369     -2.655135

! phi = -15.0
 0.293590      5.588070      3.732620      3.217620      3.272450
 2.517320      1.588700      1.381760      0.856410      0.655170
 1.616970      0.846920      0.511070      0.740760      1.021020
 1.616580     -0.342400      0.181770     -0.613920     -2.558037
-3.786839     -3.807325     -3.155346     -1.749204

! phi =  0.0
 2.832310      0.787990      0.323280      0.479230      0.628600
 0.976330      1.238750      1.671950      1.645480      2.520340
 1.606970      0.776350      0.119780      0.070390      0.121170
-1.569230     -1.213010     -1.846360     -2.744510     -3.792530
-3.934880     -3.615930     -2.675750     -0.924170

! phi =  15.0
-0.778340     -1.912680     -2.052140     -1.846280     -1.047430
 0.183400      1.682950      2.223500      1.358370      2.448660
 1.436920      0.678570     -0.237060     -0.535320     -0.790380
-2.182580     -3.251140     -4.195110     -4.269270     -3.908210
-3.455620     -2.773970      1.755370      0.313410

! phi =  30.0
-2.963810     -3.483730     -3.441809     -2.400349     -1.125083
 0.336200      1.428450      1.394630      0.970370      2.462720
 1.522430      0.553620     -0.407380     -1.482950     -3.613920
-4.159810     -4.709721     -4.496271     -3.764540     -2.959140
-1.963850     -1.071260     -1.599580     -2.445320

! phi =  45.0
-4.021496     -3.836549     -3.365327     -2.334377     -0.984725
 0.362000      0.814380      0.754110      0.502370      1.903420
 0.770220     -0.416420     -3.286310     -3.875270     -4.611550
-5.287977     -5.146239     -4.038627     -2.865450     -2.368170
-2.860490     -3.416560     -3.666490     -3.595217

! phi =  60.0
-3.353683     -2.984416     -2.317412     -1.240143     -0.257890
 0.722610      0.668070      0.438130      2.395330      1.632470
-2.041450     -3.218100     -3.915080     -4.568574     -5.096776
-5.526955     -5.005312     -3.777879     -2.840678     -3.508820
-3.756430     -3.640810     -3.451845     -3.342810

! phi =  75.0
-2.248733     -1.641080     -1.010583      0.039656      0.636063
 0.823710      0.517140     -0.013120     -0.370910     -1.192809
-2.305650     -3.420580     -4.484960     -5.597237     -5.601264
-5.727739     -4.740525     -3.819378     -3.685150     -4.151360
-4.170739     -3.725589     -3.736732     -2.620673

! phi =  90.0
-1.720840     -1.177830     -0.428430      0.277730      0.807900
 0.803260      0.482510     -0.336900     -0.786270     -1.774070
-2.793220     -3.828560     -5.211800     -6.294328     -6.617221
-5.763953     -5.072995     -3.911450     -4.158306     -4.473413

```



```

-4.099325    -3.769822    -3.157300    -2.651694

! phi = 105.0
-1.850640    -1.092420    -0.445020     0.128490     1.005520
 0.884820     0.485850    -0.218470    -0.857670    -1.682330
-3.014400    -4.481110    -6.053510    -6.865400    -6.871130
-5.728240    -3.912230    -4.802110    -5.034640    -4.715990
-4.600554    -4.086721    -3.274630    -2.410940

! phi = 120.0
-1.969230    -1.116650    -0.540250    -0.150330     0.763520
 1.038890     0.758480     0.313530    -0.333050    -1.872770
-3.366270    -5.008260    -6.124810    -7.034830    -6.724320
-3.700200    -4.510620    -5.185650    -5.361620    -4.847490
-4.444320    -4.004260    -3.415720    -2.751230

! phi = 135.0
-2.111250    -1.168960    -0.322790    -0.006920     0.316660
 1.086270     0.939170     0.625340    -0.166360    -1.830310
-3.469470    -4.946030    -6.112560    -1.915580    -4.047310
-4.996740    -4.996730    -4.842690    -4.886620    -4.300540
-4.494620    -4.442210    -4.163570    -3.183510

! phi = 150.0
-1.757590    -0.403620     0.023920     0.362390     0.634520
 1.264920     1.361360     0.948420    -0.073680    -1.483560
-3.152820     1.835120    -1.762860    -5.093660    -5.744830
-5.390070    -4.783930    -4.190630    -4.115420    -4.042280
-4.125570    -4.028550    -4.026100    -2.937910

! phi = 165.0
-0.810590    -0.071500     0.378890     0.543310     1.277880
 1.641310     1.698840     1.519950     0.631950    -1.088670
-2.736530    -0.735240    -4.563830    -6.408350    -5.889450
-5.141750    -4.194970    -3.666490    -3.843450    -3.555000
-3.548722    -3.246995    -2.751289    -1.814368

! alanine before proline map
C   NH1  CT1  C   NH1  CT1  C   N   24
! phi = -180.0
 0.126790     0.768700     0.971260     1.250970     2.121010
 2.720430     2.089440     1.789790     0.780870    -0.688474
 1.001130    -2.200520    -4.827670    -4.821447    -4.913223
-3.591106    -2.766446    -2.784200    -2.454589    -2.346991
-2.335350    -1.522656    -0.951542    -0.036650

! phi = -165.0
-0.127133     1.377090     1.577020     1.872290     2.398990
 2.486630     2.436754     1.929070     1.086456     0.643400
 0.258676    -2.800440    -4.009477    -4.135306    -3.420090
-2.602140    -2.299128    -1.501241    -1.101780    -0.861434
-0.640168    -0.207701    -1.076344    -1.122030

! phi = -150.0
 0.084069     1.420317     1.624350     2.047200     2.653910
 2.716410     2.321416     1.985454     1.557466     2.463293
-0.225720    -1.815886    -2.583256    -3.006154    -2.551995
-1.890683    -1.354215    -0.727243     0.068512    -0.225016

```

|                |           |           |           |           |           |
|----------------|-----------|-----------|-----------|-----------|-----------|
|                | -0.765479 | -1.283444 | -1.293226 | -0.816303 |           |
| ! phi = -135.0 | 0.927992  | 1.521370  | 2.242218  | 2.546305  | 3.111384  |
|                | 2.918410  | 2.460813  | 2.187970  | 2.058314  | 1.852278  |
|                | 0.115935  | -1.183897 | -1.995479 | -2.278329 | -1.959136 |
|                | -1.340467 | -0.932949 | 0.021790  | 0.313725  | -0.517358 |
|                | -1.152891 | -0.983285 | -0.566518 | -0.442565 |           |
| ! phi = -120.0 | 1.357468  | 1.959160  | 2.698894  | 3.037857  | 3.698960  |
|                | 3.558453  | 2.639296  | 2.773853  | 2.719664  | 1.627997  |
|                | 0.705667  | -0.785637 | -2.118268 | -2.628489 | -1.803113 |
|                | -0.425969 | -0.062320 | 0.439040  | 0.910952  | -0.546994 |
|                | -0.968118 | -0.856791 | -0.250116 | 0.449309  |           |
| ! phi = -105.0 | 2.045006  | 2.544424  | 2.818030  | 3.088582  | 3.370620  |
|                | 3.551568  | 3.073520  | 2.903794  | 2.956634  | 2.124759  |
|                | 0.906487  | -0.823628 | -2.090819 | -2.241579 | -1.456524 |
|                | 0.206160  | 0.082195  | 0.771710  | 1.040241  | -0.124647 |
|                | -0.316550 | -0.164333 | 0.314474  | 0.733747  |           |
| ! phi = -90.0  | 1.451735  | 2.748481  | 2.738185  | 3.156796  | 3.450028  |
|                | 3.344157  | 3.180200  | 3.898724  | 3.335030  | 2.440579  |
|                | 0.912671  | -0.606502 | -1.511772 | -1.620864 | -0.962798 |
|                | -0.020653 | 0.415153  | 0.908250  | 0.459433  | 0.145910  |
|                | -0.071054 | 0.017622  | 0.280839  | 0.748823  |           |
| ! phi = -75.0  | 1.378160  | 3.345958  | 2.352424  | 3.063543  | 3.814070  |
|                | 3.700796  | 3.580310  | 4.212293  | 3.536425  | 1.693809  |
|                | 0.095172  | -0.682452 | -0.123614 | -0.427765 | -0.598368 |
|                | 0.226352  | 0.423308  | 0.301999  | 0.551890  | 0.191719  |
|                | -0.253585 | -0.190548 | -0.253412 | 0.468922  |           |
| ! phi = -60.0  | 0.237754  | 1.229980  | 1.716960  | 3.168570  | 4.208190  |
|                | 4.391860  | 4.276080  | 3.673107  | 2.272295  | -0.482789 |
|                | -0.406695 | -0.038919 | -0.357600 | -0.823341 | -0.173146 |
|                | 0.139806  | 0.267796  | 0.322420  | 0.309664  | -0.666399 |
|                | -0.948631 | -1.534365 | -1.479968 | -0.204264 |           |
| ! phi = -45.0  | -1.184837 | 0.078060  | 2.347410  | 4.211350  | 5.376000  |
|                | 5.389940  | 4.380200  | 2.461506  | 1.123713  | 0.107016  |
|                | 0.007574  | -0.149443 | -0.797230 | -0.582210 | 0.082910  |
|                | 0.271580  | -0.045570 | 0.379430  | 0.247770  | -0.890956 |
|                | -1.582430 | -1.954532 | -1.980965 | -2.000433 |           |
| ! phi = -30.0  | -1.174720 | 1.067030  | 4.180460  | 6.741610  | 6.070770  |
|                | 4.806470  | 2.783340  | 1.320806  | 0.765978  | -0.008448 |
|                | 0.276860  | -0.707140 | 1.314360  | 1.522590  | 1.915550  |
|                | 2.223490  | 0.194290  | 0.534000  | 0.331780  | -1.595147 |
|                | -2.849141 | -3.550465 | -3.277369 | -2.655135 |           |
| ! phi = -15.0  | 0.293590  | 5.588070  | 3.732620  | 3.217620  | 3.272450  |
|                | 2.517320  | 1.588700  | 1.381760  | 0.856410  | 0.655170  |

|               |           |           |           |           |
|---------------|-----------|-----------|-----------|-----------|
| 1.616970      | 0.846920  | 0.511070  | 0.740760  | 1.021020  |
| 1.616580      | -0.342400 | 0.181770  | -0.613920 | -2.558037 |
| -3.786839     | -3.807325 | -3.155346 | -1.749204 |           |
| ! phi = 0.0   |           |           |           |           |
| 2.832310      | 0.787990  | 0.323280  | 0.479230  | 0.628600  |
| 0.976330      | 1.238750  | 1.671950  | 1.645480  | 2.520340  |
| 1.606970      | 0.776350  | 0.119780  | 0.070390  | 0.121170  |
| -1.569230     | -1.213010 | -1.846360 | -2.744510 | -3.792530 |
| -3.934880     | -3.615930 | -2.675750 | -0.924170 |           |
| ! phi = 15.0  |           |           |           |           |
| -0.778340     | -1.912680 | -2.052140 | -1.846280 | -1.047430 |
| 0.183400      | 1.682950  | 2.223500  | 1.358370  | 2.448660  |
| 1.436920      | 0.678570  | -0.237060 | -0.535320 | -0.790380 |
| -2.182580     | -3.251140 | -4.195110 | -4.269270 | -3.908210 |
| -3.455620     | -2.773970 | 1.755370  | 0.313410  |           |
| ! phi = 30.0  |           |           |           |           |
| -2.963810     | -3.483730 | -3.441809 | -2.400349 | -1.125083 |
| 0.336200      | 1.428450  | 1.394630  | 0.970370  | 2.462720  |
| 1.522430      | 0.553620  | -0.407380 | -1.482950 | -3.613920 |
| -4.159810     | -4.709721 | -4.496271 | -3.764540 | -2.959140 |
| -1.963850     | -1.071260 | -1.599580 | -2.445320 |           |
| ! phi = 45.0  |           |           |           |           |
| -4.021496     | -3.836549 | -3.365327 | -2.334377 | -0.984725 |
| 0.362000      | 0.814380  | 0.754110  | 0.502370  | 1.903420  |
| 0.770220      | -0.416420 | -3.286310 | -3.875270 | -4.611550 |
| -5.287977     | -5.146239 | -4.038627 | -2.865450 | -2.368170 |
| -2.860490     | -3.416560 | -3.666490 | -3.595217 |           |
| ! phi = 60.0  |           |           |           |           |
| -3.353683     | -2.984416 | -2.317412 | -1.240143 | -0.257890 |
| 0.722610      | 0.668070  | 0.438130  | 2.395330  | 1.632470  |
| -2.041450     | -3.218100 | -3.915080 | -4.568574 | -5.096776 |
| -5.526955     | -5.005312 | -3.777879 | -2.840678 | -3.508820 |
| -3.756430     | -3.640810 | -3.451845 | -3.342810 |           |
| ! phi = 75.0  |           |           |           |           |
| -2.248733     | -1.641080 | -1.010583 | 0.039656  | 0.636063  |
| 0.823710      | 0.517140  | -0.013120 | -0.370910 | -1.192809 |
| -2.305650     | -3.420580 | -4.484960 | -5.597237 | -5.601264 |
| -5.727739     | -4.740525 | -3.819378 | -3.685150 | -4.151360 |
| -4.170739     | -3.725589 | -3.736732 | -2.620673 |           |
| ! phi = 90.0  |           |           |           |           |
| -1.720840     | -1.177830 | -0.428430 | 0.277730  | 0.807900  |
| 0.803260      | 0.482510  | -0.336900 | -0.786270 | -1.774070 |
| -2.793220     | -3.828560 | -5.211800 | -6.294328 | -6.617221 |
| -5.763953     | -5.072995 | -3.911450 | -4.158306 | -4.473413 |
| -4.099325     | -3.769822 | -3.157300 | -2.651694 |           |
| ! phi = 105.0 |           |           |           |           |
| -1.850640     | -1.092420 | -0.445020 | 0.128490  | 1.005520  |
| 0.884820      | 0.485850  | -0.218470 | -0.857670 | -1.682330 |
| -3.014400     | -4.481110 | -6.053510 | -6.865400 | -6.871130 |
| -5.728240     | -3.912230 | -4.802110 | -5.034640 | -4.715990 |
| -4.600554     | -4.086721 | -3.274630 | -2.410940 |           |
| ! phi = 120.0 |           |           |           |           |

|               |           |           |           |           |     |   |     |    |
|---------------|-----------|-----------|-----------|-----------|-----|---|-----|----|
| -1.969230     | -1.116650 | -0.540250 | -0.150330 | 0.763520  |     |   |     |    |
| 1.038890      | 0.758480  | 0.313530  | -0.333050 | -1.872770 |     |   |     |    |
| -3.366270     | -5.008260 | -6.124810 | -7.034830 | -6.724320 |     |   |     |    |
| -3.700200     | -4.510620 | -5.185650 | -5.361620 | -4.847490 |     |   |     |    |
| -4.444320     | -4.004260 | -3.415720 | -2.751230 |           |     |   |     |    |
| ! phi = 135.0 |           |           |           |           |     |   |     |    |
| -2.111250     | -1.168960 | -0.322790 | -0.006920 | 0.316660  |     |   |     |    |
| 1.086270      | 0.939170  | 0.625340  | -0.166360 | -1.830310 |     |   |     |    |
| -3.469470     | -4.946030 | -6.112560 | -1.915580 | -4.047310 |     |   |     |    |
| -4.996740     | -4.996730 | -4.842690 | -4.886620 | -4.300540 |     |   |     |    |
| -4.494620     | -4.442210 | -4.163570 | -3.183510 |           |     |   |     |    |
| ! phi = 150.0 |           |           |           |           |     |   |     |    |
| -1.757590     | -0.403620 | 0.023920  | 0.362390  | 0.634520  |     |   |     |    |
| 1.264920      | 1.361360  | 0.948420  | -0.073680 | -1.483560 |     |   |     |    |
| -3.152820     | 1.835120  | -1.762860 | -5.093660 | -5.744830 |     |   |     |    |
| -5.390070     | -4.783930 | -4.190630 | -4.115420 | -4.042280 |     |   |     |    |
| -4.125570     | -4.028550 | -4.026100 | -2.937910 |           |     |   |     |    |
| ! phi = 165.0 |           |           |           |           |     |   |     |    |
| -0.810590     | -0.071500 | 0.378890  | 0.543310  | 1.277880  |     |   |     |    |
| 1.641310      | 1.698840  | 1.519950  | 0.631950  | -1.088670 |     |   |     |    |
| -2.736530     | -0.735240 | -4.563830 | -6.408350 | -5.889450 |     |   |     |    |
| -5.141750     | -4.194970 | -3.666490 | -3.843450 | -3.555000 |     |   |     |    |
| -3.548722     | -3.246995 | -2.751289 | -1.814368 |           |     |   |     |    |
| ! proline     |           |           |           |           |     |   |     |    |
| ! VTZ CBS map |           |           |           |           |     |   |     |    |
| C             | N         | CP1       | C         | N         | CP1 | C | NH1 | 24 |
| ! phi = -180  |           |           |           |           |     |   |     |    |
| 2.973500      | 3.348200  | 3.062900  | 2.113400  | 1.040500  |     |   |     |    |
| 0.770600      | 0.785200  | 0.263300  | -0.479000 | -0.583000 |     |   |     |    |
| -0.463800     | -0.292600 | 0.000000  | 0.259100  | 0.177100  |     |   |     |    |
| -0.151200     | -0.173500 | 0.211700  | 0.348900  | -0.135600 |     |   |     |    |
| -0.950000     | -1.256600 | -0.292800 | 1.560000  |           |     |   |     |    |
| ! phi = -165  |           |           |           |           |     |   |     |    |
| 5.674100      | 6.011400  | 5.562700  | 4.467300  | 3.390800  |     |   |     |    |
| 3.008800      | 2.848600  | 2.311200  | 1.661400  | 1.468400  |     |   |     |    |
| 1.142700      | 1.437400  | 2.113200  | 2.799500  | 2.989100  |     |   |     |    |
| 2.869000      | 3.016100  | 3.328500  | 3.232900  | 2.547600  |     |   |     |    |
| 1.647200      | 1.422700  | 2.517100  | 4.339800  |           |     |   |     |    |
| ! phi = -150  |           |           |           |           |     |   |     |    |
| 6.752800      | 6.973200  | 6.444300  | 5.389800  | 4.438600  |     |   |     |    |
| 4.046000      | 3.832800  | 3.442400  | 3.303500  | 3.010000  |     |   |     |    |
| 2.838100      | 3.162200  | 3.778300  | 4.362800  | 4.603600  |     |   |     |    |
| 4.546200      | 4.702100  | 4.837200  | 4.549500  | 3.849600  |     |   |     |    |
| 3.099200      | 3.031800  | 4.060200  | 5.624800  |           |     |   |     |    |
| ! phi = -135  |           |           |           |           |     |   |     |    |
| 7.627800      | 8.153400  | 7.342500  | 5.893500  | 4.799200  |     |   |     |    |
| 4.433400      | 4.551500  | 4.442800  | 2.222200  | 0.776300  |     |   |     |    |
| 0.790000      | 2.152300  | 3.932900  | 5.274900  | 5.830800  |     |   |     |    |
| 5.988600      | 5.588500  | 5.211000  | 4.918000  | 4.292100  |     |   |     |    |
| 3.495500      | 3.449800  | 4.617700  | 6.311700  |           |     |   |     |    |
| ! phi = -120  |           |           |           |           |     |   |     |    |

|              |           |           |           |           |
|--------------|-----------|-----------|-----------|-----------|
| 8.115600     | 8.477200  | 7.754300  | 6.585000  | 5.537900  |
| 4.964300     | 4.929000  | 4.421200  | 2.336100  | 1.257800  |
| 1.769300     | 3.359900  | 5.018000  | 6.055500  | 6.217600  |
| 5.726100     | 5.512200  | 5.820200  | 5.716700  | 4.872300  |
| 4.066800     | 4.094600  | 5.284900  | 6.931500  |           |
| ! phi = -105 |           |           |           |           |
| 9.249700     | 9.483000  | 8.668500  | 7.525300  | 7.003200  |
| 6.834600     | 6.822100  | 5.287600  | 3.320600  | 2.640300  |
| 3.464800     | 5.100300  | 6.537600  | 6.885600  | 5.842000  |
| 5.248700     | 5.540200  | 6.652400  | 7.196700  | 6.625400  |
| 5.710100     | 5.581700  | 6.651500  | 8.192800  |           |
| ! phi = -90  |           |           |           |           |
| 9.335600     | 9.208000  | 8.564600  | 8.010200  | 7.885100  |
| 8.212200     | 8.737100  | 8.429100  | 7.306500  | 6.474200  |
| 6.651300     | 7.484700  | 8.195300  | 8.295000  | 7.407200  |
| 6.529900     | 6.242000  | 6.227500  | 6.347300  | 6.449700  |
| 6.404700     | 6.579300  | 7.391700  | 8.570700  |           |
| ! phi = -75  |           |           |           |           |
| 10.955200    | 11.455400 | 11.173300 | 10.428700 | 10.062400 |
| 10.044500    | 9.279600  | 6.965100  | 5.361500  | 5.102700  |
| 6.267600     | 7.871600  | 8.009800  | 7.104500  | 6.616400  |
| 6.733700     | 7.504000  | 8.664700  | 9.282800  | 8.795900  |
| 7.872500     | 7.612400  | 8.498100  | 9.894000  |           |
| ! phi = -60  |           |           |           |           |
| 8.422900     | 8.529200  | 8.608500  | 9.306400  | 10.239400 |
| 11.025900    | 11.510800 | 9.283500  | 7.566000  | 6.624600  |
| 7.038700     | 8.222400  | 8.786400  | 8.512000  | 8.103500  |
| 7.988200     | 8.192900  | 8.291000  | 8.055600  | 7.436800  |
| 6.651800     | 6.317000  | 6.802500  | 7.746300  |           |
| ! phi = -45  |           |           |           |           |
| 6.913200     | 7.937400  | 8.610800  | 9.316600  | 9.388500  |
| 9.408400     | 8.828800  | 7.297900  | 5.456400  | 4.742700  |
| 5.793100     | 7.118800  | 7.565400  | 7.598500  | 7.438700  |
| 7.512500     | 7.878100  | 8.082200  | 7.642700  | 6.320500  |
| 4.680400     | 3.830500  | 4.215800  | 5.435200  |           |
| ! phi = -30  |           |           |           |           |
| 5.466700     | 7.116000  | 8.908800  | 8.347200  | 7.413500  |
| 7.047000     | 6.031600  | 4.193100  | 2.674800  | 3.023700  |
| 4.485300     | 5.451700  | 6.214900  | 6.422600  | 6.229300  |
| 6.191100     | 6.488900  | 6.646400  | 5.833400  | 3.751300  |
| 1.719800     | 1.064900  | 1.955800  | 3.860800  |           |
| ! phi = -15  |           |           |           |           |
| 3.061500     | 5.603800  | 12.179500 | 6.295200  | 5.323400  |
| 4.826500     | 3.705600  | 2.461500  | 2.291600  | 3.145900  |
| 3.562100     | 4.443600  | 5.337500  | 5.728800  | 5.694800  |
| 5.641600     | 5.943300  | 6.169000  | 4.759500  | 2.569400  |
| 1.357100     | 1.669800  | 3.212300  | 5.031900  |           |
| ! phi = 0    |           |           |           |           |
| 8.085900     | 8.051100  | 5.023600  | 3.450800  | 2.836100  |
| 2.192500     | 1.566200  | 1.456300  | 2.039300  | 1.945200  |
| 2.188400     | 2.921300  | 3.467500  | 3.543500  | 3.374500  |
| 3.472300     | 4.069900  | 3.615600  | 2.082200  | 0.958600  |
| 0.792600     | 1.494200  | 2.794900  | 4.853100  |           |

```

! phi = 15
  6.639500    5.177400    3.252300    1.952700    1.078400
  0.888300    1.505400    2.442300    2.178600    1.578600
  1.777400    2.395400    2.820200    2.795200    2.662400
  2.917100    2.562100    1.557900    1.322300    1.631400
  2.051200    2.555600    3.039100    4.915000

! phi = 30
  7.548800    5.095500    2.747000    0.955200    0.444500
  1.318700    2.733300    3.223200    2.565500    2.150900
  2.394400    2.939300    3.266000    3.210000    3.113400
  2.491300    0.978300    0.815300    1.522700    2.055600
  2.199900    2.327600    3.474200    7.977800

! phi = 45
  0.000000    0.000000    0.000000    0.000000    0.000000
  0.000000    0.000000    0.000000    0.000000    0.000000
  0.000000    0.000000    0.000000    0.000000    0.000000
  0.000000    0.000000    0.000000    0.000000    0.000000
  0.000000    0.000000    0.000000    0.000000

! phi = 60
  0.000000    0.000000    0.000000    0.000000    0.000000
  0.000000    0.000000    0.000000    0.000000    0.000000
  0.000000    0.000000    0.000000    0.000000    0.000000
  0.000000    0.000000    0.000000    0.000000    0.000000
  0.000000    0.000000    0.000000    0.000000

! phi = 75
  0.000000    0.000000    0.000000    0.000000    0.000000
  0.000000    0.000000    0.000000    0.000000    0.000000
  0.000000    0.000000    0.000000    0.000000    0.000000
  0.000000    0.000000    0.000000    0.000000    0.000000
  0.000000    0.000000    0.000000    0.000000

! phi = 90
  0.000000    0.000000    0.000000    0.000000    0.000000
  0.000000    0.000000    0.000000    0.000000    0.000000
  0.000000    0.000000    0.000000    0.000000    0.000000
  0.000000    0.000000    0.000000    0.000000    0.000000
  0.000000    0.000000    0.000000    0.000000

! phi = 105
  0.000000    0.000000    0.000000    0.000000    0.000000
  0.000000    0.000000    0.000000    0.000000    0.000000
  0.000000    0.000000    0.000000    0.000000    0.000000
  0.000000    0.000000    0.000000    0.000000    0.000000
  0.000000    0.000000    0.000000    0.000000

! phi = 120
  0.000000    0.000000    0.000000    0.000000    0.000000
  0.000000    0.000000    0.000000    0.000000    0.000000
  0.000000    0.000000    0.000000    0.000000    0.000000
  0.000000    0.000000    0.000000    0.000000    0.000000
  0.000000    0.000000    0.000000    0.000000

! phi = 135
  0.000000    0.000000    0.000000    0.000000    0.000000
  0.000000    0.000000    0.000000    0.000000    0.000000
  0.000000    0.000000    0.000000    0.000000

```

```

0.000000    0.000000    0.000000    0.000000    0.000000
0.000000    0.000000    0.000000    0.000000    0.000000

! phi = 150
0.000000    0.000000    0.000000    0.000000    0.000000
0.000000    0.000000    0.000000    0.000000    0.000000
0.000000    0.000000    0.000000    0.000000    0.000000
0.000000    0.000000    0.000000    0.000000    0.000000
0.000000    0.000000    0.000000    0.000000    0.000000

! phi = 165
0.000000    0.000000    0.000000    0.000000    0.000000
0.000000    0.000000    0.000000    0.000000    0.000000
0.000000    0.000000    0.000000    0.000000    0.000000
0.000000    0.000000    0.000000    0.000000    0.000000
0.000000    0.000000    0.000000    0.000000    0.000000

!2 adjacent prolines
! VTZ CBS map
C      N      CP1  C      N      CP1      C      N 24
! phi = -180
2.973500    3.348200    3.062900    2.113400    1.040500
0.770600    0.785200    0.263300   -0.479000   -0.583000
-0.463800   -0.292600    0.000000    0.259100    0.177100
-0.151200   -0.173500    0.211700    0.348900   -0.135600
-0.950000   -1.256600   -0.292800    1.560000

! phi = -165
5.674100    6.011400    5.562700    4.467300    3.390800
3.008800    2.848600    2.311200    1.661400    1.468400
1.142700    1.437400    2.113200    2.799500    2.989100
2.869000    3.016100    3.328500    3.232900    2.547600
1.647200    1.422700    2.517100    4.339800

! phi = -150
6.752800    6.973200    6.444300    5.389800    4.438600
4.046000    3.832800    3.442400    3.303500    3.010000
2.838100    3.162200    3.778300    4.362800    4.603600
4.546200    4.702100    4.837200    4.549500    3.849600
3.099200    3.031800    4.060200    5.624800

! phi = -135
7.627800    8.153400    7.342500    5.893500    4.799200
4.433400    4.551500    4.442800    2.222200    0.776300
0.790000    2.152300    3.932900    5.274900    5.830800
5.988600    5.588500    5.211000    4.918000    4.292100
3.495500    3.449800    4.617700    6.311700

! phi = -120
8.115600    8.477200    7.754300    6.585000    5.537900
4.964300    4.929000    4.421200    2.336100    1.257800
1.769300    3.359900    5.018000    6.055500    6.217600
5.726100    5.512200    5.820200    5.716700    4.872300
4.066800    4.094600    5.284900    6.931500

! phi = -105
9.249700    9.483000    8.668500    7.525300    7.003200
6.834600    6.822100    5.287600    3.320600    2.640300

```

|             |           |           |           |           |
|-------------|-----------|-----------|-----------|-----------|
| 3.464800    | 5.100300  | 6.537600  | 6.885600  | 5.842000  |
| 5.248700    | 5.540200  | 6.652400  | 7.196700  | 6.625400  |
| 5.710100    | 5.581700  | 6.651500  | 8.192800  |           |
| ! phi = -90 |           |           |           |           |
| 9.335600    | 9.208000  | 8.564600  | 8.010200  | 7.885100  |
| 8.212200    | 8.737100  | 8.429100  | 7.306500  | 6.474200  |
| 6.651300    | 7.484700  | 8.195300  | 8.295000  | 7.407200  |
| 6.529900    | 6.242000  | 6.227500  | 6.347300  | 6.449700  |
| 6.404700    | 6.579300  | 7.391700  | 8.570700  |           |
| ! phi = -75 |           |           |           |           |
| 10.955200   | 11.455400 | 11.173300 | 10.428700 | 10.062400 |
| 10.044500   | 9.279600  | 6.965100  | 5.361500  | 5.102700  |
| 6.267600    | 7.871600  | 8.009800  | 7.104500  | 6.616400  |
| 6.733700    | 7.504000  | 8.664700  | 9.282800  | 8.795900  |
| 7.872500    | 7.612400  | 8.498100  | 9.894000  |           |
| ! phi = -60 |           |           |           |           |
| 8.422900    | 8.529200  | 8.608500  | 9.306400  | 10.239400 |
| 11.025900   | 11.510800 | 9.283500  | 7.566000  | 6.624600  |
| 7.038700    | 8.222400  | 8.786400  | 8.512000  | 8.103500  |
| 7.988200    | 8.192900  | 8.291000  | 8.055600  | 7.436800  |
| 6.651800    | 6.317000  | 6.802500  | 7.746300  |           |
| ! phi = -45 |           |           |           |           |
| 6.913200    | 7.937400  | 8.610800  | 9.316600  | 9.388500  |
| 9.408400    | 8.828800  | 7.297900  | 5.456400  | 4.742700  |
| 5.793100    | 7.118800  | 7.565400  | 7.598500  | 7.438700  |
| 7.512500    | 7.878100  | 8.082200  | 7.642700  | 6.320500  |
| 4.680400    | 3.830500  | 4.215800  | 5.435200  |           |
| ! phi = -30 |           |           |           |           |
| 5.466700    | 7.116000  | 8.908800  | 8.347200  | 7.413500  |
| 7.047000    | 6.031600  | 4.193100  | 2.674800  | 3.023700  |
| 4.485300    | 5.451700  | 6.214900  | 6.422600  | 6.229300  |
| 6.191100    | 6.488900  | 6.646400  | 5.833400  | 3.751300  |
| 1.719800    | 1.064900  | 1.955800  | 3.860800  |           |
| ! phi = -15 |           |           |           |           |
| 3.061500    | 5.603800  | 12.179500 | 6.295200  | 5.323400  |
| 4.826500    | 3.705600  | 2.461500  | 2.291600  | 3.145900  |
| 3.562100    | 4.443600  | 5.337500  | 5.728800  | 5.694800  |
| 5.641600    | 5.943300  | 6.169000  | 4.759500  | 2.569400  |
| 1.357100    | 1.669800  | 3.212300  | 5.031900  |           |
| ! phi = 0   |           |           |           |           |
| 8.085900    | 8.051100  | 5.023600  | 3.450800  | 2.836100  |
| 2.192500    | 1.566200  | 1.456300  | 2.039300  | 1.945200  |
| 2.188400    | 2.921300  | 3.467500  | 3.543500  | 3.374500  |
| 3.472300    | 4.069900  | 3.615600  | 2.082200  | 0.958600  |
| 0.792600    | 1.494200  | 2.794900  | 4.853100  |           |
| ! phi = 15  |           |           |           |           |
| 6.639500    | 5.177400  | 3.252300  | 1.952700  | 1.078400  |
| 0.888300    | 1.505400  | 2.442300  | 2.178600  | 1.578600  |
| 1.777400    | 2.395400  | 2.820200  | 2.795200  | 2.662400  |
| 2.917100    | 2.562100  | 1.557900  | 1.322300  | 1.631400  |
| 2.051200    | 2.555600  | 3.039100  | 4.915000  |           |
| ! phi = 30  |           |           |           |           |



|          |          |          |          |          |
|----------|----------|----------|----------|----------|
| 7.548800 | 5.095500 | 2.747000 | 0.955200 | 0.444500 |
| 1.318700 | 2.733300 | 3.223200 | 2.565500 | 2.150900 |
| 2.394400 | 2.939300 | 3.266000 | 3.210000 | 3.113400 |
| 2.491300 | 0.978300 | 0.815300 | 1.522700 | 2.055600 |
| 2.199900 | 2.327600 | 3.474200 | 7.977800 |          |

! phi = 45

|          |          |          |          |          |
|----------|----------|----------|----------|----------|
| 0.000000 | 0.000000 | 0.000000 | 0.000000 | 0.000000 |
| 0.000000 | 0.000000 | 0.000000 | 0.000000 | 0.000000 |
| 0.000000 | 0.000000 | 0.000000 | 0.000000 | 0.000000 |
| 0.000000 | 0.000000 | 0.000000 | 0.000000 | 0.000000 |
| 0.000000 | 0.000000 | 0.000000 | 0.000000 | 0.000000 |

! phi = 60

|          |          |          |          |          |
|----------|----------|----------|----------|----------|
| 0.000000 | 0.000000 | 0.000000 | 0.000000 | 0.000000 |
| 0.000000 | 0.000000 | 0.000000 | 0.000000 | 0.000000 |
| 0.000000 | 0.000000 | 0.000000 | 0.000000 | 0.000000 |
| 0.000000 | 0.000000 | 0.000000 | 0.000000 | 0.000000 |
| 0.000000 | 0.000000 | 0.000000 | 0.000000 | 0.000000 |

! phi = 75

|          |          |          |          |          |
|----------|----------|----------|----------|----------|
| 0.000000 | 0.000000 | 0.000000 | 0.000000 | 0.000000 |
| 0.000000 | 0.000000 | 0.000000 | 0.000000 | 0.000000 |
| 0.000000 | 0.000000 | 0.000000 | 0.000000 | 0.000000 |
| 0.000000 | 0.000000 | 0.000000 | 0.000000 | 0.000000 |
| 0.000000 | 0.000000 | 0.000000 | 0.000000 | 0.000000 |

! phi = 90

|          |          |          |          |          |
|----------|----------|----------|----------|----------|
| 0.000000 | 0.000000 | 0.000000 | 0.000000 | 0.000000 |
| 0.000000 | 0.000000 | 0.000000 | 0.000000 | 0.000000 |
| 0.000000 | 0.000000 | 0.000000 | 0.000000 | 0.000000 |
| 0.000000 | 0.000000 | 0.000000 | 0.000000 | 0.000000 |
| 0.000000 | 0.000000 | 0.000000 | 0.000000 | 0.000000 |

! phi = 105

|          |          |          |          |          |
|----------|----------|----------|----------|----------|
| 0.000000 | 0.000000 | 0.000000 | 0.000000 | 0.000000 |
| 0.000000 | 0.000000 | 0.000000 | 0.000000 | 0.000000 |
| 0.000000 | 0.000000 | 0.000000 | 0.000000 | 0.000000 |
| 0.000000 | 0.000000 | 0.000000 | 0.000000 | 0.000000 |
| 0.000000 | 0.000000 | 0.000000 | 0.000000 | 0.000000 |

! phi = 120

|          |          |          |          |          |
|----------|----------|----------|----------|----------|
| 0.000000 | 0.000000 | 0.000000 | 0.000000 | 0.000000 |
| 0.000000 | 0.000000 | 0.000000 | 0.000000 | 0.000000 |
| 0.000000 | 0.000000 | 0.000000 | 0.000000 | 0.000000 |
| 0.000000 | 0.000000 | 0.000000 | 0.000000 | 0.000000 |
| 0.000000 | 0.000000 | 0.000000 | 0.000000 | 0.000000 |

! phi = 135

|          |          |          |          |          |
|----------|----------|----------|----------|----------|
| 0.000000 | 0.000000 | 0.000000 | 0.000000 | 0.000000 |
| 0.000000 | 0.000000 | 0.000000 | 0.000000 | 0.000000 |
| 0.000000 | 0.000000 | 0.000000 | 0.000000 | 0.000000 |
| 0.000000 | 0.000000 | 0.000000 | 0.000000 | 0.000000 |
| 0.000000 | 0.000000 | 0.000000 | 0.000000 | 0.000000 |

! phi = 150

|          |          |          |          |          |
|----------|----------|----------|----------|----------|
| 0.000000 | 0.000000 | 0.000000 | 0.000000 | 0.000000 |
| 0.000000 | 0.000000 | 0.000000 | 0.000000 | 0.000000 |
| 0.000000 | 0.000000 | 0.000000 | 0.000000 | 0.000000 |
| 0.000000 | 0.000000 | 0.000000 | 0.000000 | 0.000000 |
| 0.000000 | 0.000000 | 0.000000 | 0.000000 | 0.000000 |

```

! phi = 165
  0.000000    0.000000    0.000000    0.000000    0.000000
  0.000000    0.000000    0.000000    0.000000    0.000000
  0.000000    0.000000    0.000000    0.000000    0.000000
  0.000000    0.000000    0.000000    0.000000    0.000000
  0.000000    0.000000    0.000000    0.000000    0.000000

```

```

! glycine map
! VTZ CBS map

```

```

C      NH1  CT2  C      NH1  CT2  C      NH1  24

```

```

! phi = -180
  0.235350    0.182300    0.177200    0.396800    0.859400
  1.489700    2.092500    2.297700    1.808600    0.696200
 -0.563300   -1.432700   -1.015100    1.426300   -0.564300
  0.696200    1.808200    2.301700    2.092600    1.489100
  0.859500    0.396900    0.176900    0.182400

```

```

! phi = -165
  0.020100   -0.203800   -0.269700    0.014200    0.620800
  1.392400    2.046200    2.188200    1.683900    0.688500
 -0.373700   -0.703500    0.837800    3.704000   -0.730100
  0.594100    1.713100    2.205800    2.026400    1.529800
  1.027400    0.623800    0.348400    0.182800

```

```

! phi = -150
 -0.533600   -0.807400   -0.804600   -0.379800    0.365300
  1.168000    1.641000    1.618100    1.302200    0.615100
  0.065700    0.738500    2.959500   -2.036600   -0.934600
  0.407900    1.517000    1.984800    1.833100    1.435200
  0.995600    0.562200    0.150600   -0.209000

```

```

! phi = -135
 -1.208500   -1.429400   -1.319200   -0.817500   -0.112400
  0.454400    0.737600    0.879300    0.850100    0.670300
  0.943500   -2.651200   -2.829400   -2.199100   -1.065700
  0.279600    1.322000    1.668300    1.521300    1.193900
  0.765300    0.246000   -0.315500   -0.823200

```

```

! phi = -120
 -1.789100   -1.965500   -1.860700   -1.447900   -0.896500
 -0.401000   -0.015100    0.321300    0.634600    0.976300
 -1.977500   -2.883200   -2.848500   -2.137900   -0.960300
  0.308700    1.098100    1.245300    1.133600    0.881800
  0.448200   -0.153900   -0.823700   -1.404300

```

```

! phi = -105
 -2.246700   -2.487000   -2.473700   -2.135600   -1.577700
 -0.980600   -0.429100    0.144700    0.734000   -0.918300
 -2.299200   -2.882200   -2.668600   -1.847100   -0.719800
  0.107000    0.496000    0.553500    0.584300    0.494000
  0.098300   -0.529800   -1.237900   -1.840100

```

```

! phi = -90
 -2.851100   -3.181100   -3.199500   -2.785300   -2.054300
 -1.242900   -0.476500    0.288100   -0.045300   -1.470600
 -2.558800   -2.869400   -2.450300   -1.582200   -0.930800
 -0.426400   -0.022700    0.000000   -0.097400   -0.136100

```

|             |           |           |           |           |           |
|-------------|-----------|-----------|-----------|-----------|-----------|
|             | -0.439600 | -1.038600 | -1.741000 | -2.373200 |           |
| ! phi = -75 |           |           |           |           |           |
|             | -3.961800 | -4.268200 | -4.109000 | -3.364700 | -2.252200 |
|             | -1.140400 | -0.209800 | 0.487300  | -0.746200 | -2.127700 |
|             | -2.932100 | -2.898500 | -2.247900 | -1.730400 | -1.177200 |
|             | -0.448200 | 0.034900  | -0.073300 | -0.531600 | -0.933300 |
|             | -1.360700 | -2.009200 | -2.745700 | -3.424900 |           |
| ! phi = -60 |           |           |           |           |           |
|             | -5.408000 | -5.355100 | -4.640100 | -3.283200 | -1.710200 |
|             | -0.423800 | 0.354400  | -0.103700 | -1.577700 | -2.828300 |
|             | -3.151200 | -2.649200 | -2.183000 | -1.761200 | -0.981700 |
|             | -0.174700 | 0.262600  | 0.039200  | -0.663000 | -1.530700 |
|             | -2.478200 | -3.465600 | -4.334200 | -5.011200 |           |
| ! phi = -45 |           |           |           |           |           |
|             | -6.093200 | -5.298400 | -3.816620 | -1.922530 | -0.196160 |
|             | 0.768200  | 0.568500  | -0.831300 | -2.343900 | -3.037100 |
|             | -2.663700 | -2.191100 | -2.022900 | -1.438500 | -0.649000 |
|             | 0.077000  | 0.441500  | 0.257500  | -0.491100 | -1.820600 |
|             | -3.473100 | -4.895200 | -5.790700 | -6.205900 |           |
| ! phi = -30 |           |           |           |           |           |
|             | -5.258225 | -3.675795 | -1.631110 | 0.430085  | 1.496470  |
|             | 0.318200  | -0.555100 | -1.695500 | -2.434200 | -2.192600 |
|             | -1.691300 | -1.890000 | -1.708500 | -1.206300 | -0.567400 |
|             | 0.054300  | 0.497200  | 0.599600  | -0.171000 | -2.137600 |
|             | -4.237000 | -5.584100 | -6.135100 | -6.067000 |           |
| ! phi = -15 |           |           |           |           |           |
|             | -3.161820 | -0.902080 | 1.432450  | -1.452885 | -1.560780 |
|             | -1.665600 | -1.783100 | -1.755100 | -1.329300 | -0.731100 |
|             | -1.317000 | -1.662800 | -1.601200 | -1.294900 | -0.817300 |
|             | -0.197100 | 0.549500  | 0.850400  | -0.689700 | -2.819900 |
|             | -4.393000 | -5.111500 | -5.205690 | -4.654785 |           |
| ! phi = 0   |           |           |           |           |           |
|             | 0.034035  | -2.349860 | -3.412065 | -3.620070 | -3.450950 |
|             | -2.875650 | -1.787800 | -0.541250 | 0.410450  | -0.372500 |
|             | -1.126850 | -1.498450 | -1.608700 | -1.498450 | -1.126850 |
|             | -0.372500 | 0.410450  | -0.541250 | -1.787800 | -2.875650 |
|             | -3.450950 | -3.620070 | -3.412065 | -2.349860 |           |
| ! phi = 15  |           |           |           |           |           |
|             | -3.162345 | -4.654785 | -5.205690 | -5.111500 | -4.393000 |
|             | -2.819900 | -0.689700 | 0.850400  | 0.549500  | -0.197100 |
|             | -0.817300 | -1.294900 | -1.601200 | -1.662800 | -1.317000 |
|             | -0.731100 | -1.329300 | -1.755100 | -1.783100 | -1.665600 |
|             | -1.560780 | -1.452885 | 1.432450  | -0.902080 |           |
| ! phi = 30  |           |           |           |           |           |
|             | -5.258220 | -6.067000 | -6.135100 | -5.584100 | -4.237000 |
|             | -2.137600 | -0.171000 | 0.599600  | 0.497200  | 0.054300  |
|             | -0.567400 | -1.206300 | -1.708500 | -1.890000 | -1.691300 |
|             | -2.192600 | -2.434200 | -1.695500 | -0.555100 | 0.318200  |
|             | 1.496470  | 0.430085  | -1.631110 | -3.675795 |           |
| ! phi = 45  |           |           |           |           |           |
|             | -6.093300 | -6.205900 | -5.790700 | -4.895200 | -3.473100 |
|             | -1.820600 | -0.491100 | 0.257500  | 0.441500  | 0.077000  |

|             |           |           |           |           |
|-------------|-----------|-----------|-----------|-----------|
| -0.649000   | -1.438500 | -2.022900 | -2.191100 | -2.663700 |
| -3.037100   | -2.343900 | -0.831300 | 0.568500  | 0.768200  |
| -0.196160   | -1.922530 | -3.816620 | -5.298400 |           |
| ! phi = 60  |           |           |           |           |
| -5.407500   | -5.011200 | -4.334200 | -3.465600 | -2.478200 |
| -1.530700   | -0.663000 | 0.039200  | 0.262600  | -0.174700 |
| -0.981700   | -1.761200 | -2.183000 | -2.649200 | -3.151200 |
| -2.828300   | -1.577700 | -0.103700 | 0.354400  | -0.423800 |
| -1.710200   | -3.283200 | -4.640100 | -5.355100 |           |
| ! phi = 75  |           |           |           |           |
| -3.961900   | -3.424900 | -2.745700 | -2.009200 | -1.360700 |
| -0.933300   | -0.531600 | -0.073300 | 0.034900  | -0.448200 |
| -1.177200   | -1.730400 | -2.247900 | -2.898500 | -2.932100 |
| -2.127700   | -0.746200 | 0.487300  | -0.209800 | -1.140400 |
| -2.252200   | -3.364700 | -4.109000 | -4.268200 |           |
| ! phi = 90  |           |           |           |           |
| -2.854500   | -2.373200 | -1.741000 | -1.038600 | -0.439600 |
| -0.136100   | -0.097400 | 0.000000  | -0.022700 | -0.426400 |
| -0.930800   | -1.582200 | -2.450300 | -2.869400 | -2.558800 |
| -1.470600   | -0.045300 | 0.288100  | -0.476500 | -1.242900 |
| -2.054300   | -2.785300 | -3.199500 | -3.181100 |           |
| ! phi = 105 |           |           |           |           |
| -2.246400   | -1.840100 | -1.237900 | -0.529800 | 0.098300  |
| 0.494000    | 0.584300  | 0.553500  | 0.496000  | 0.107000  |
| -0.719800   | -1.847100 | -2.668600 | -2.882200 | -2.299200 |
| -0.918300   | 0.734000  | 0.144700  | -0.429100 | -0.980600 |
| -1.577700   | -2.135600 | -2.473700 | -2.487000 |           |
| ! phi = 120 |           |           |           |           |
| -1.788800   | -1.404300 | -0.823700 | -0.153900 | 0.448200  |
| 0.881800    | 1.133600  | 1.245300  | 1.098100  | 0.308700  |
| -0.960300   | -2.137900 | -2.848500 | -2.883200 | -1.977500 |
| 0.976300    | 0.634600  | 0.321300  | -0.015100 | -0.401000 |
| -0.896500   | -1.447900 | -1.860700 | -1.965500 |           |
| ! phi = 135 |           |           |           |           |
| -1.208900   | -0.823200 | -0.315500 | 0.246000  | 0.765300  |
| 1.193900    | 1.521300  | 1.668300  | 1.322000  | 0.279600  |
| -1.065700   | -2.199100 | -2.829400 | -2.651200 | 0.943500  |
| 0.670300    | 0.850100  | 0.879300  | 0.737600  | 0.454400  |
| -0.112400   | -0.817500 | -1.319200 | -1.429400 |           |
| ! phi = 150 |           |           |           |           |
| -0.533400   | -0.209000 | 0.150600  | 0.562200  | 0.995600  |
| 1.435200    | 1.833100  | 1.984800  | 1.517000  | 0.407900  |
| -0.934600   | -2.036600 | 2.959500  | 0.738500  | 0.065700  |
| 0.615100    | 1.302200  | 1.618100  | 1.641000  | 1.168000  |
| 0.365300    | -0.379800 | -0.804600 | -0.807400 |           |
| ! phi = 165 |           |           |           |           |
| 0.019900    | 0.182800  | 0.348400  | 0.623800  | 1.027400  |
| 1.529800    | 2.026400  | 2.205800  | 1.713100  | 0.594100  |
| -0.730100   | 3.704000  | 0.837800  | -0.703500 | -0.373700 |
| 0.688500    | 1.683900  | 2.188200  | 2.046200  | 1.392400  |
| 0.620800    | 0.014200  | -0.269700 | -0.203800 |           |

! glycine before proline map: use glycine map

```

! VTZ CBS map
C   NH1  CT2  C   NH1  CT2  C   N   24

! phi = -180
  0.235350    0.182300    0.177200    0.396800    0.859400
  1.489700    2.092500    2.297700    1.808600    0.696200
 -0.563300   -1.432700   -1.015100    1.426300   -0.564300
  0.696200    1.808200    2.301700    2.092600    1.489100
  0.859500    0.396900    0.176900    0.182400

! phi = -165
  0.020100   -0.203800   -0.269700    0.014200    0.620800
  1.392400    2.046200    2.188200    1.683900    0.688500
 -0.373700   -0.703500    0.837800    3.704000   -0.730100
  0.594100    1.713100    2.205800    2.026400    1.529800
  1.027400    0.623800    0.348400    0.182800

! phi = -150
 -0.533600   -0.807400   -0.804600   -0.379800    0.365300
  1.168000    1.641000    1.618100    1.302200    0.615100
  0.065700    0.738500    2.959500   -2.036600   -0.934600
  0.407900    1.517000    1.984800    1.833100    1.435200
  0.995600    0.562200    0.150600   -0.209000

! phi = -135
 -1.208500   -1.429400   -1.319200   -0.817500   -0.112400
  0.454400    0.737600    0.879300    0.850100    0.670300
  0.943500   -2.651200   -2.829400   -2.199100   -1.065700
  0.279600    1.322000    1.668300    1.521300    1.193900
  0.765300    0.246000   -0.315500   -0.823200

! phi = -120
 -1.789100   -1.965500   -1.860700   -1.447900   -0.896500
 -0.401000   -0.015100    0.321300    0.634600    0.976300
 -1.977500   -2.883200   -2.848500   -2.137900   -0.960300
  0.308700    1.098100    1.245300    1.133600    0.881800
  0.448200   -0.153900   -0.823700   -1.404300

! phi = -105
 -2.246700   -2.487000   -2.473700   -2.135600   -1.577700
 -0.980600   -0.429100    0.144700    0.734000   -0.918300
 -2.299200   -2.882200   -2.668600   -1.847100   -0.719800
  0.107000    0.496000    0.553500    0.584300    0.494000
  0.098300   -0.529800   -1.237900   -1.840100

! phi = -90
 -2.851100   -3.181100   -3.199500   -2.785300   -2.054300
 -1.242900   -0.476500    0.288100   -0.045300   -1.470600
 -2.558800   -2.869400   -2.450300   -1.582200   -0.930800
 -0.426400   -0.022700    0.000000   -0.097400   -0.136100
 -0.439600   -1.038600   -1.741000   -2.373200

! phi = -75
 -3.961800   -4.268200   -4.109000   -3.364700   -2.252200
 -1.140400   -0.209800    0.487300   -0.746200   -2.127700
 -2.932100   -2.898500   -2.247900   -1.730400   -1.177200
 -0.448200    0.034900   -0.073300   -0.531600   -0.933300
 -1.360700   -2.009200   -2.745700   -3.424900

! phi = -60
 -5.408000   -5.355100   -4.640100   -3.283200   -1.710200

```

|             |           |           |           |           |
|-------------|-----------|-----------|-----------|-----------|
| -0.423800   | 0.354400  | -0.103700 | -1.577700 | -2.828300 |
| -3.151200   | -2.649200 | -2.183000 | -1.761200 | -0.981700 |
| -0.174700   | 0.262600  | 0.039200  | -0.663000 | -1.530700 |
| -2.478200   | -3.465600 | -4.334200 | -5.011200 |           |
| ! phi = -45 |           |           |           |           |
| -6.093200   | -5.298400 | -3.816620 | -1.922530 | -0.196160 |
| 0.768200    | 0.568500  | -0.831300 | -2.343900 | -3.037100 |
| -2.663700   | -2.191100 | -2.022900 | -1.438500 | -0.649000 |
| 0.077000    | 0.441500  | 0.257500  | -0.491100 | -1.820600 |
| -3.473100   | -4.895200 | -5.790700 | -6.205900 |           |
| ! phi = -30 |           |           |           |           |
| -5.258225   | -3.675795 | -1.631110 | 0.430085  | 1.496470  |
| 0.318200    | -0.555100 | -1.695500 | -2.434200 | -2.192600 |
| -1.691300   | -1.890000 | -1.708500 | -1.206300 | -0.567400 |
| 0.054300    | 0.497200  | 0.599600  | -0.171000 | -2.137600 |
| -4.237000   | -5.584100 | -6.135100 | -6.067000 |           |
| ! phi = -15 |           |           |           |           |
| -3.161820   | -0.902080 | 1.432450  | -1.452885 | -1.560780 |
| -1.665600   | -1.783100 | -1.755100 | -1.329300 | -0.731100 |
| -1.317000   | -1.662800 | -1.601200 | -1.294900 | -0.817300 |
| -0.197100   | 0.549500  | 0.850400  | -0.689700 | -2.819900 |
| -4.393000   | -5.111500 | -5.205690 | -4.654785 |           |
| ! phi = 0   |           |           |           |           |
| 0.034035    | -2.349860 | -3.412065 | -3.620070 | -3.450950 |
| -2.875650   | -1.787800 | -0.541250 | 0.410450  | -0.372500 |
| -1.126850   | -1.498450 | -1.608700 | -1.498450 | -1.126850 |
| -0.372500   | 0.410450  | -0.541250 | -1.787800 | -2.875650 |
| -3.450950   | -3.620070 | -3.412065 | -2.349860 |           |
| ! phi = 15  |           |           |           |           |
| -3.162345   | -4.654785 | -5.205690 | -5.111500 | -4.393000 |
| -2.819900   | -0.689700 | 0.850400  | 0.549500  | -0.197100 |
| -0.817300   | -1.294900 | -1.601200 | -1.662800 | -1.317000 |
| -0.731100   | -1.329300 | -1.755100 | -1.783100 | -1.665600 |
| -1.560780   | -1.452885 | 1.432450  | -0.902080 |           |
| ! phi = 30  |           |           |           |           |
| -5.258220   | -6.067000 | -6.135100 | -5.584100 | -4.237000 |
| -2.137600   | -0.171000 | 0.599600  | 0.497200  | 0.054300  |
| -0.567400   | -1.206300 | -1.708500 | -1.890000 | -1.691300 |
| -2.192600   | -2.434200 | -1.695500 | -0.555100 | 0.318200  |
| 1.496470    | 0.430085  | -1.631110 | -3.675795 |           |
| ! phi = 45  |           |           |           |           |
| -6.093300   | -6.205900 | -5.790700 | -4.895200 | -3.473100 |
| -1.820600   | -0.491100 | 0.257500  | 0.441500  | 0.077000  |
| -0.649000   | -1.438500 | -2.022900 | -2.191100 | -2.663700 |
| -3.037100   | -2.343900 | -0.831300 | 0.568500  | 0.768200  |
| -0.196160   | -1.922530 | -3.816620 | -5.298400 |           |
| ! phi = 60  |           |           |           |           |
| -5.407500   | -5.011200 | -4.334200 | -3.465600 | -2.478200 |
| -1.530700   | -0.663000 | 0.039200  | 0.262600  | -0.174700 |
| -0.981700   | -1.761200 | -2.183000 | -2.649200 | -3.151200 |
| -2.828300   | -1.577700 | -0.103700 | 0.354400  | -0.423800 |
| -1.710200   | -3.283200 | -4.640100 | -5.355100 |           |

|             |           |           |           |           |
|-------------|-----------|-----------|-----------|-----------|
| ! phi = 75  |           |           |           |           |
| -3.961900   | -3.424900 | -2.745700 | -2.009200 | -1.360700 |
| -0.933300   | -0.531600 | -0.073300 | 0.034900  | -0.448200 |
| -1.177200   | -1.730400 | -2.247900 | -2.898500 | -2.932100 |
| -2.127700   | -0.746200 | 0.487300  | -0.209800 | -1.140400 |
| -2.252200   | -3.364700 | -4.109000 | -4.268200 |           |
| ! phi = 90  |           |           |           |           |
| -2.854500   | -2.373200 | -1.741000 | -1.038600 | -0.439600 |
| -0.136100   | -0.097400 | 0.000000  | -0.022700 | -0.426400 |
| -0.930800   | -1.582200 | -2.450300 | -2.869400 | -2.558800 |
| -1.470600   | -0.045300 | 0.288100  | -0.476500 | -1.242900 |
| -2.054300   | -2.785300 | -3.199500 | -3.181100 |           |
| ! phi = 105 |           |           |           |           |
| -2.246400   | -1.840100 | -1.237900 | -0.529800 | 0.098300  |
| 0.494000    | 0.584300  | 0.553500  | 0.496000  | 0.107000  |
| -0.719800   | -1.847100 | -2.668600 | -2.882200 | -2.299200 |
| -0.918300   | 0.734000  | 0.144700  | -0.429100 | -0.980600 |
| -1.577700   | -2.135600 | -2.473700 | -2.487000 |           |
| ! phi = 120 |           |           |           |           |
| -1.788800   | -1.404300 | -0.823700 | -0.153900 | 0.448200  |
| 0.881800    | 1.133600  | 1.245300  | 1.098100  | 0.308700  |
| -0.960300   | -2.137900 | -2.848500 | -2.883200 | -1.977500 |
| 0.976300    | 0.634600  | 0.321300  | -0.015100 | -0.401000 |
| -0.896500   | -1.447900 | -1.860700 | -1.965500 |           |
| ! phi = 135 |           |           |           |           |
| -1.208900   | -0.823200 | -0.315500 | 0.246000  | 0.765300  |
| 1.193900    | 1.521300  | 1.668300  | 1.322000  | 0.279600  |
| -1.065700   | -2.199100 | -2.829400 | -2.651200 | 0.943500  |
| 0.670300    | 0.850100  | 0.879300  | 0.737600  | 0.454400  |
| -0.112400   | -0.817500 | -1.319200 | -1.429400 |           |
| ! phi = 150 |           |           |           |           |
| -0.533400   | -0.209000 | 0.150600  | 0.562200  | 0.995600  |
| 1.435200    | 1.833100  | 1.984800  | 1.517000  | 0.407900  |
| -0.934600   | -2.036600 | 2.959500  | 0.738500  | 0.065700  |
| 0.615100    | 1.302200  | 1.618100  | 1.641000  | 1.168000  |
| 0.365300    | -0.379800 | -0.804600 | -0.807400 |           |
| ! phi = 165 |           |           |           |           |
| 0.019900    | 0.182800  | 0.348400  | 0.623800  | 1.027400  |
| 1.529800    | 2.026400  | 2.205800  | 1.713100  | 0.594100  |
| -0.730100   | 3.704000  | 0.837800  | -0.703500 | -0.373700 |
| 0.688500    | 1.683900  | 2.188200  | 2.046200  | 1.392400  |
| 0.620800    | 0.014200  | -0.269700 | -0.203800 |           |

## References:

- (1) Hu, J.-S.; Bax, A. *J. Am. Chem. Soc.* **1997**, *119*, 6360-6368.
- (2) Ding, K.; Gronenborn, A. M. *J. Am. Chem. Soc.* **2004**, *126*, 6232-6233.
- (3) Hennig, M.; Bermel, W.; Schwalbe, H.; Griesinger, C. *J. Am. Chem. Soc.* **2000**, *122*, 6268-6277.
- (4) Shen, Y.; Bax, A. *J. Biomol. NMR* **2010**, *48*, 13-22.
- (5) Chou, J. J.; Case, D. A.; Bax, A. *J. Am. Chem. Soc.* **2003**, *125*, 8959-8966.
- (6) Pérez, C.; Löhr, F.; Rüterjans, H.; Schmidt, J. M. *J. Am. Chem. Soc.* **2001**, *123*, 7081-7093.
- (7) Graf; Nguyen, P. H.; Stock, G.; Schwalbe, H. *J. Am. Chem. Soc.* **2007**, *129*, 1179-1189.
- (8) Schmidt, J. M.; Blümel, M.; Löhr, F.; Rüterjans, H. *J. Biomol. NMR* **1999**, *14*, 1-12.

- (9) Case, D. A.; Scheurer, C.; Brüsweiler, R. *J. Am. Chem. Soc.* **2000**, *122*, 10390-10397.
- (10) Aliev, A. E.; Courtier-Murias, D. *J. Phys. Chem. B* **2010**, *113*, 12358-12375.
